# Supplementary material
Source: PubMed Central journal article supplement (PMC7513343)

## Supplementary Information

**HSD1787, a tetrahydro-3*H*-pyrazolo[4,3-*f*]quinoline compound synthesized via Povarov reaction, potently inhibits proliferation of cancer cell lines at nanomolar concentrations**

Neetu Dayal<sup>1</sup>, Modi Wang<sup>1</sup> and Herman O. Sintim<sup>1,2\*</sup>

<sup>1</sup>Department of Chemistry, Purdue University, 560 Oval Drive, West Lafayette, Indiana 47907, United States

<sup>2</sup>Center for Drug Discovery, Purdue University, 720 Clinic Drive, West Lafayette, Indiana 47907, United States

## Contents of Supporting Information

Single crystal X-ray diffraction data

Table S1. Experimental details for single crystal X-ray diffraction of compound 1

Figure S1:  $^1\text{H}$  NMR of compound 1

Figure S2:  $^{13}\text{C}$  NMR of compound 1

Figure S3:  $^1\text{H}$  NMR of compound 2

Figure S4:  $^{13}\text{C}$  NMR of compound 2

Figure S5:  $^1\text{H}$  NMR of compound 3

Figure S6:  $^{13}\text{C}$  NMR of compound 3

Figure S7:  $^1\text{H}$  NMR of compound 4

Figure S8:  $^{13}\text{C}$  NMR of compound 4

Figure S9:  $^1\text{H}$  NMR of compound 5

Figure S10:  $^{13}\text{C}$  NMR of compound 5

Figure S11:  $^1\text{H}$  NMR of compound 6

Figure S12:  $^{13}\text{C}$  NMR of compound 6

Figure S13:  $^1\text{H}$  NMR of compound 7

Figure S14:  $^{13}\text{C}$  NMR of compound 7

Figure S15:  $^1\text{H}$  NMR of compound 8

Figure S16:  $^{13}\text{C}$  NMR of compound 8

Figure S17:  $^1\text{H}$  NMR of compound 9

Figure S18:  $^{13}\text{C}$  NMR of compound 9

Figure S19:  $^1\text{H}$  NMR of compound 10

Figure S20:  $^{13}\text{C}$  NMR of compound 10

Figure S21:  $^1\text{H}$  NMR of compound 11

Figure S22:  $^{13}\text{C}$  NMR of compound 11

Figure S23:  $^1\text{H}$  NMR of compound 12

Figure S24:  $^{13}\text{C}$  NMR of compound 12

Figure S25:  $^1\text{H}$  NMR of compound 13

Figure S26:  $^{13}\text{C}$  NMR of compound 13

Figure S27:  $^1\text{H}$  NMR of compound 14

Figure S28:  $^{13}\text{C}$  NMR of compound 14

Figure S29:  $^1\text{H}$  NMR of compound 15

Figure S30:  $^{13}\text{C}$  NMR of compound 15

Figure S31:  $^1\text{H}$  NMR of compound 16

Figure S32:  $^{13}\text{C}$  NMR of compound 16

Figure S33:  $^1\text{H}$  NMR of compound 17

Figure S34:  $^{13}\text{C}$  NMR of compound 17

Figure S35:  $^1\text{H}$  NMR of compound HSD1787

Figure S36:  $^{13}\text{C}$  NMR of compound HSD1787

Figure S37:  $^1\text{H}$  NMR of compound 18

Figure S38:  $^{13}\text{C}$  NMR of compound 18

Figure S39:  $^1\text{H}$  NMR of compound S-1

Figure S40:  $^{13}\text{C}$  NMR of compound S-1

Figure S41:  $^1\text{H}$  NMR of compound 19

Figure S42:  $^{13}\text{C}$  NMR of compound 19

### Single crystal X-ray diffraction data

Single crystals of compound 1 were coated with trace of fomblin oil and quickly transferred to the goniometer head of a Bruker Quest diffractometer with a fixed chi angle, a sealed tube fine focus X-ray tube, single crystal curved graphite incident beam monochromator, a Photon100 CMOS area detector and an Oxford Cryosystems low temperature device. Examination and data collection were performed with Mo  $K\alpha$  radiation ( $\lambda = 0.71073 \text{ \AA}$ ) at 150 K. Data were collected, reflections were indexed and processed, and the files scaled and corrected for absorption using APEX3 [1]. The space group was assigned and the structure was solved by direct methods using XPREP within the SHELXTL suite of programs [2] and refined by full matrix least squares against  $F^2$  with all reflections using Shelxl2018 [3] using the graphical interface Shelxle [4]. H atoms attached to carbon and oxygen atoms were positioned geometrically and constrained to ride on their parent atoms, with carbon hydrogen bond distances of  $0.95 \text{ \AA}$  for and aromatic C-H,  $0.99 \text{ \AA}$  for aliphatic  $\text{CH}_2$  moieties, and  $0.84$  for hydroxyl OH atoms, respectively. Hydroxyl H atoms were allowed to rotate but not to tip to best fit the experimental electron density.  $U_{\text{iso}}(\text{H})$  values were set to a multiple of  $U_{\text{eq}}(\text{C/O})$  with 1.5 for OH, and 1.2 for C-H and  $\text{CH}_2$  units, respectively. Complete crystallographic data, in CIF format, have been deposited with the Cambridge Crystallographic Data Centre. CCDC 2017003 contains the supplementary crystallographic data for this paper. These data can be obtained free of charge from The Cambridge Crystallographic Data Centre via [www.ccdc.cam.ac.uk/data\\_request/cif](http://www.ccdc.cam.ac.uk/data_request/cif).

[1] Bruker (2016). Apex3 v2016.9-0, Saint V8.34A, SAINT V8.37A, Bruker AXS Inc.: Madison (WI), USA, 2013/2014.

[2] a) SHELXTL suite of programs, Version 6.14, 2000-2003, Bruker Advanced X-ray Solutions, Bruker AXS Inc., Madison, Wisconsin: USA) b) Sheldrick GM. A short history of SHELX. *Acta Crystallogr A*. **2008**, *64*(1), 112–122.

[3] a) Sheldrick GM. University of Göttingen, Germany, **2018**. b) Sheldrick GM. Crystal structure refinement with SHELXL. *Acta Crystallogr Sect C Struct Chem*. **2015**, *71*(1), 3–8.

[4] Hübschle CB, Sheldrick GM, Dittrich B. ShelXle: a Qt graphical user interface for SHELXL. *J. Appl. Crystallogr*. **2011**, *44*(6), 1281–1284.

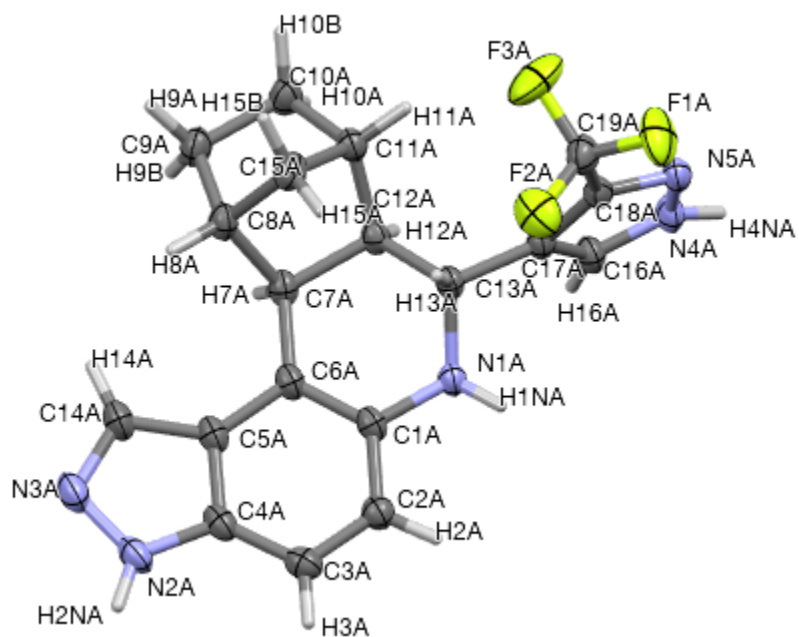

**Table S1. Experimental details for single crystal X-ray diffraction of compound 1**

| <b>Compound 1</b>           |                                       |
|-----------------------------|---------------------------------------|
| Crystal data CCDC 2017003   |                                       |
| Chemical formula            | $C_{19}H_{18}F_3N_5 \cdot 2(C_2H_6O)$ |
| $M_r$                       | 465.52                                |
| Crystal system, space group | Triclinic, $P1$                       |
| Temperature (K)             | 150                                   |
| $a, b, c$ (Å)               | 9.8976 (5), 15.4264 (8), 16.4770 (9)  |
| $\alpha, \beta, \gamma$ (°) | 105.039 (2), 105.423 (2), 93.516 (2)  |
| $V$ (Å <sup>3</sup> )       | 2319.1 (2)                            |
| $Z$                         | 4                                     |
| $F(000)$                    | 984                                   |
| $D_x$ (Mg m <sup>-3</sup> ) | 1.333                                 |

|                                                                            |                                                                                                                                     |
|----------------------------------------------------------------------------|-------------------------------------------------------------------------------------------------------------------------------------|
| Radiation type                                                             | Cu $K\alpha$                                                                                                                        |
| No. of reflections for cell measurement                                    | 9714                                                                                                                                |
| $\theta$ range ( $^{\circ}$ ) for cell measurement                         | 2.9–79.6                                                                                                                            |
| $\mu$ ( $\text{mm}^{-1}$ )                                                 | 0.87                                                                                                                                |
| Crystal shape                                                              | Plate                                                                                                                               |
| Colour                                                                     | Colourless                                                                                                                          |
| Crystal size (mm)                                                          | $0.31 \times 0.20 \times 0.04$                                                                                                      |
| Data collection                                                            |                                                                                                                                     |
| Diffraction                                                                | Bruker AXS D8 Quest CMOS diffractometer with PhotonII charge-integrating pixel array detector (CPAD)                                |
| Radiation source                                                           | I-mu-S microsource X-ray tube                                                                                                       |
| Monochromator                                                              | Laterally graded multilayer (Goebel) mirror                                                                                         |
| Detector resolution (pixels $\text{mm}^{-1}$ )                             | 7.4074                                                                                                                              |
| Scan method                                                                | $\omega$ and phi scans                                                                                                              |
| Absorption correction                                                      | Multi-scan<br><i>SADABS</i> 2016/2: Krause, L., Herbst-Irmer, R., Sheldrick G.M. & Stalke D., <i>J. Appl. Cryst.</i> 48 (2015) 3-10 |
| $T_{\min}, T_{\max}$                                                       | 0.588, 0.754                                                                                                                        |
| No. of measured, independent and observed [ $I > 2\sigma(I)$ ] reflections | 60418, 10031, 8494                                                                                                                  |
| $R_{\text{int}}$                                                           | 0.058                                                                                                                               |
| $\theta$ values ( $^{\circ}$ )                                             | $\theta_{\max} = 80.9, \theta_{\min} = 2.9$                                                                                         |
| $(\sin \theta/\lambda)_{\max}$ ( $\text{\AA}^{-1}$ )                       | 0.640                                                                                                                               |

|                                                               |                                                                                                       |
|---------------------------------------------------------------|-------------------------------------------------------------------------------------------------------|
| Range of $h, k, l$                                            | $h = -12 \rightarrow 10, k = -19 \rightarrow 19, l = -21 \rightarrow 21$                              |
| Refinement                                                    |                                                                                                       |
| Refinement on                                                 | $F^2$                                                                                                 |
| $R[F^2 > 2\sigma(F^2)], wR(F^2), S$                           | 0.047, 0.134, 1.11                                                                                    |
| No. of reflections                                            | 10031                                                                                                 |
| No. of parameters                                             | 740                                                                                                   |
| No. of restraints                                             | 390                                                                                                   |
| H-atom treatment                                              | H atoms treated by a mixture of independent and constrained refinement                                |
| Weighting scheme                                              | $w = 1/[\sigma^2(F_o^2) + (0.0646P)^2 + 0.5949P]$<br>where $P = (F_o^2 + 2F_c^2)/3$                   |
| $(\Delta/\sigma)_{\max}$                                      | 0.001                                                                                                 |
| $\Delta\rho_{\max}, \Delta\rho_{\min}$ (e $\text{\AA}^{-3}$ ) | 0.29, -0.26                                                                                           |
| Extinction method                                             | $SHELXL2018/3$ (Sheldrick 2018), $F_c^* = kFc[1 + 0.001 \times Fc^2 \lambda^3 / \sin(2\theta)]^{1/4}$ |
| Extinction coefficient                                        | 0.0021 (3)                                                                                            |

Computer programs: Apex3 v2017.3-0 (Bruker, 2017), SAINT V8.38A (Bruker, 2016), SHELXS97 (Sheldrick, 2008), SHELXL2018/3 (Sheldrick, 2015, 2018), SHELXLE Rev946 (Hübschle *et al.*, 2011).

The structure is a racemic mixture, space group P-1. There are two crystallographically independent molecules in the cell. They are chemically identical (same conformation and configuration). There are also four ethanol molecules. A bit disordered, but well resolved. Amine H atoms are located (i.e., the H atom positions are verified by the data. Description of the minor disorder :The fluorine atoms of the two trifluoromethyl groups were refined as disordered by slight rotation. The major and minor disordered moieties were each restrained to have similar geometries. Uij components of ADPs for disordered atoms closer to each other than 2.0 Angstrom were restrained to be similar. Subject to these conditions the occupancy ratios refined to 0.807(18) to 0.193(18) (molecule A) and to 0.56(4) to 0.44(4)

(molecule B). Two of the four solvate ethanol molecules were refined as disordered by inversion at the methylene carbon atom. The two disordered moieties were restrained to have similar geometries as another not disordered ethanol molecule. Uij components of ADPs for disordered atoms closer to each other than 2.0 Angstrom were restrained to be similar. Subject to these conditions the occupancy ratio refined to 0.759(7) to 0.241(7) (disorder of O4 / O5) and to 0.619(6) to 0.381(6) (disorder of O3 / O6).

Figure S1:  $^1\text{H}$  spectra of compound 1 in  $\text{DMSO-}d_6$

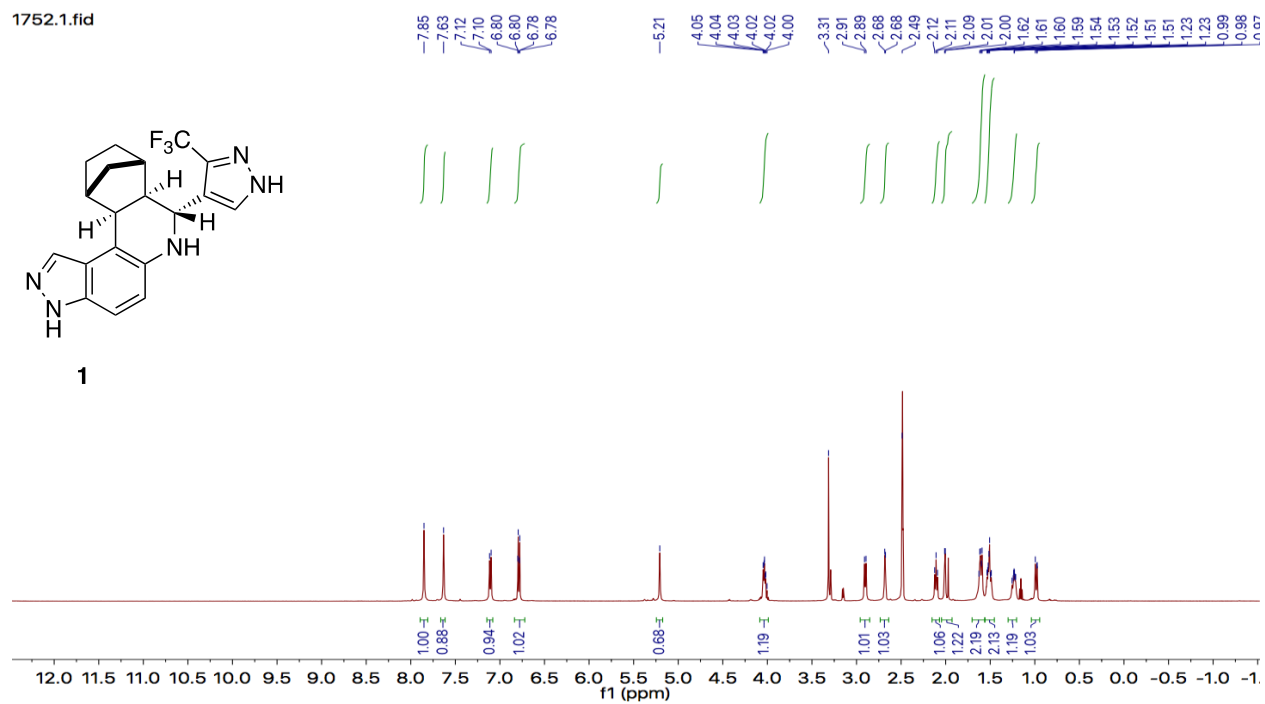

Figure S2:  $^{13}\text{C}$  spectra of compound 1 in  $\text{DMSO-}d_6$

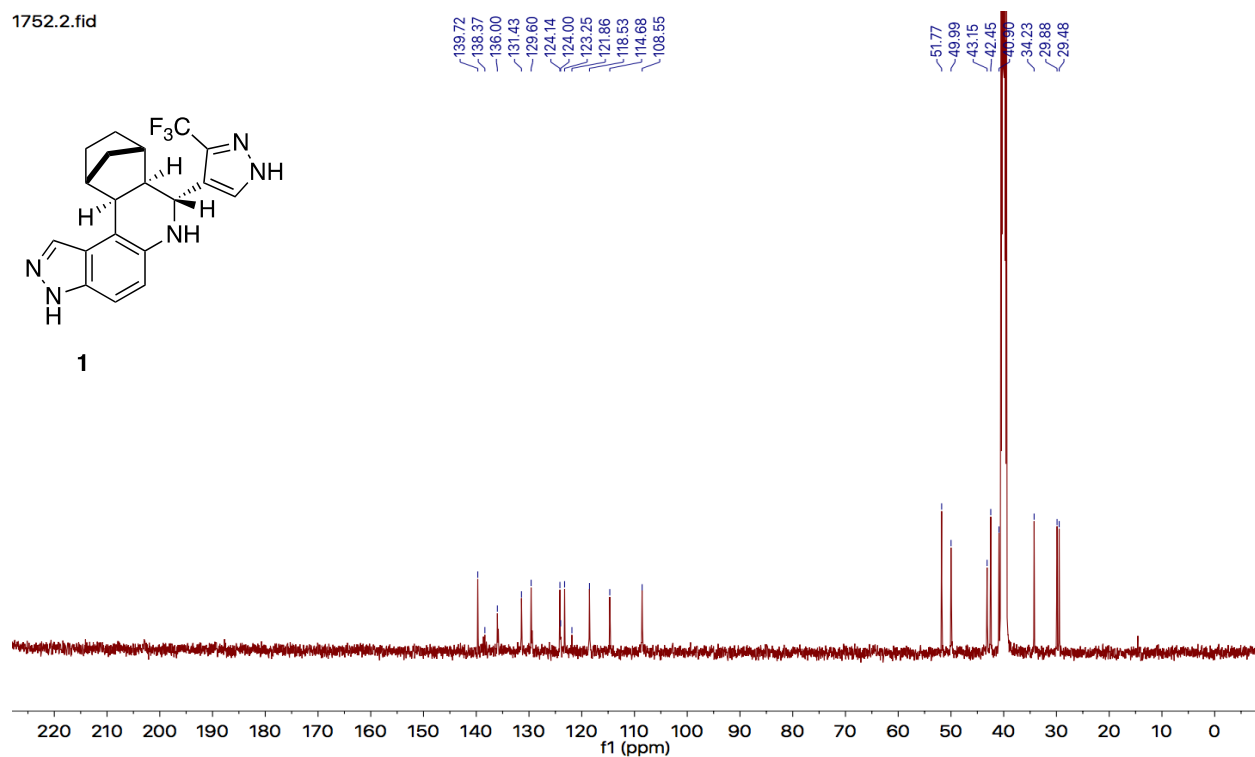



Figure S3:  $^1\text{H}$  spectra of compound 2 in  $\text{DMSO-}d_6$

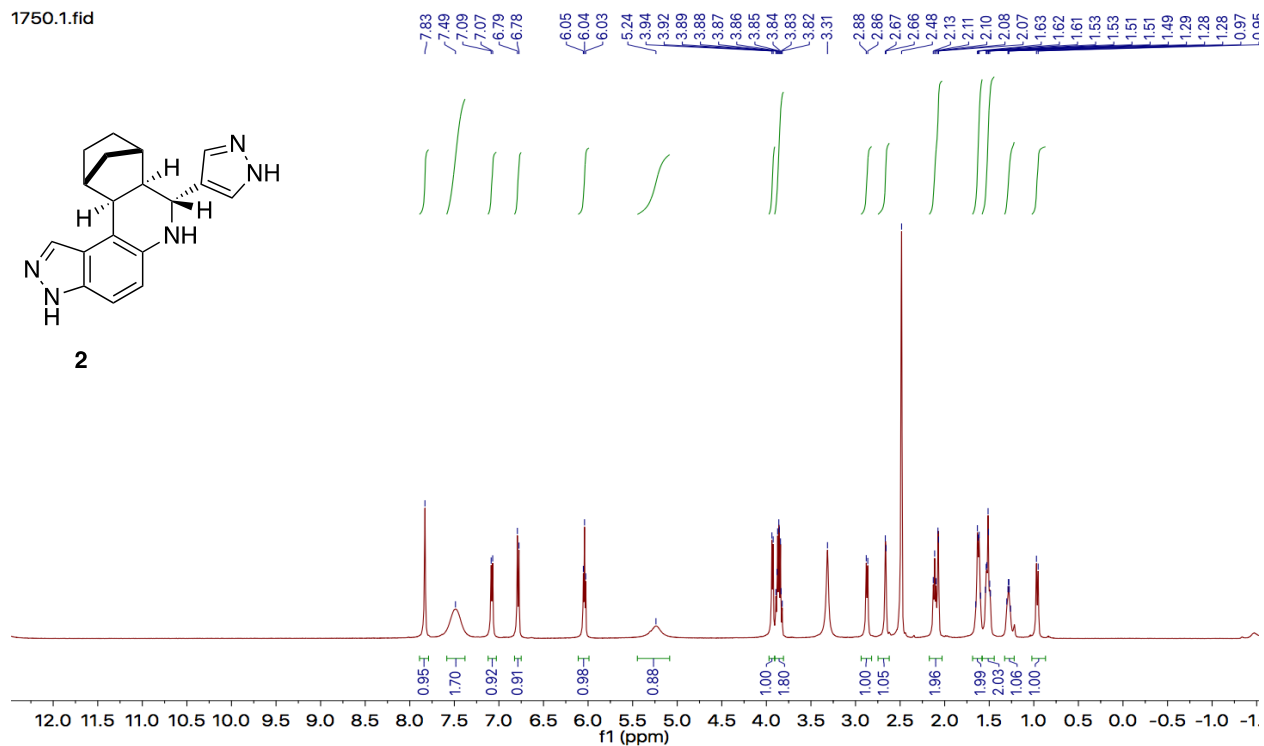

Figure S4:  $^{13}\text{C}$  spectra of compound 2 in  $\text{DMSO-}d_6$

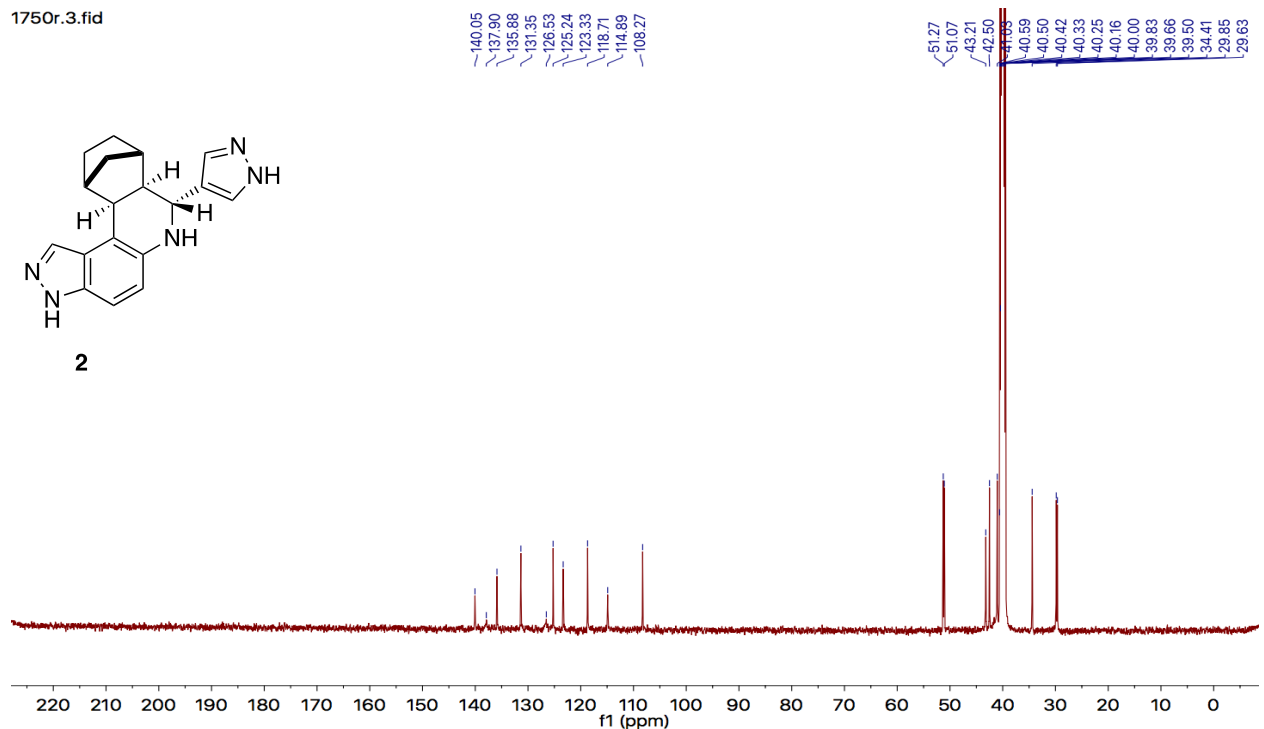

Figure S5:  $^1\text{H}$  spectra of compound 3 in methanol- $d_4$

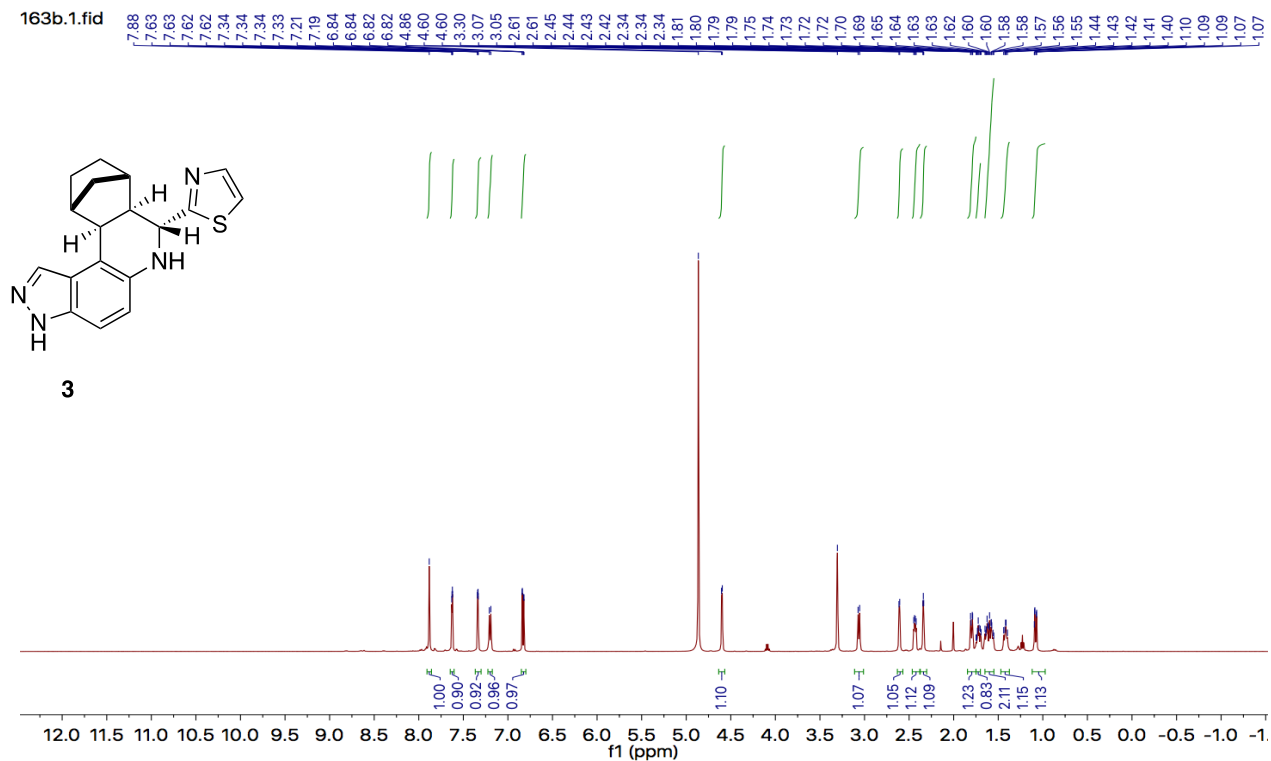

Figure S6:  $^{13}\text{C}$  spectra of compound 3 in methanol- $d_4$

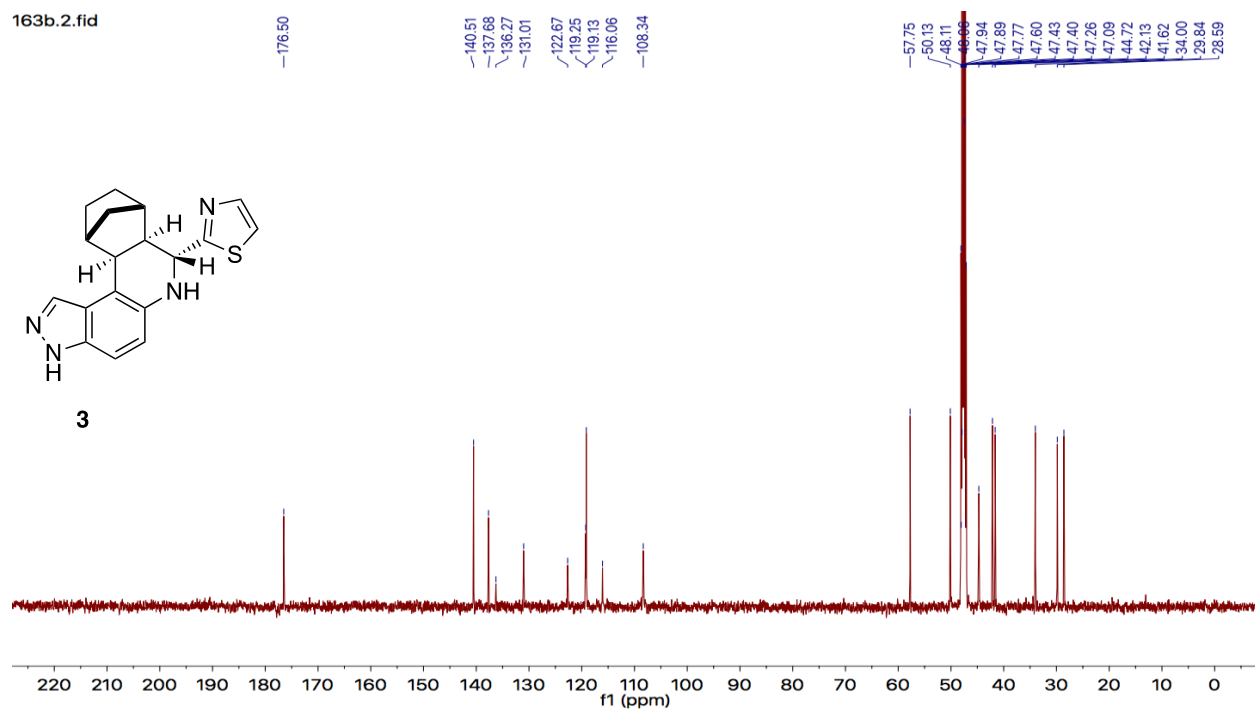

Figure S7:  $^1\text{H}$  spectra of compound 4 in methanol- $d_4$

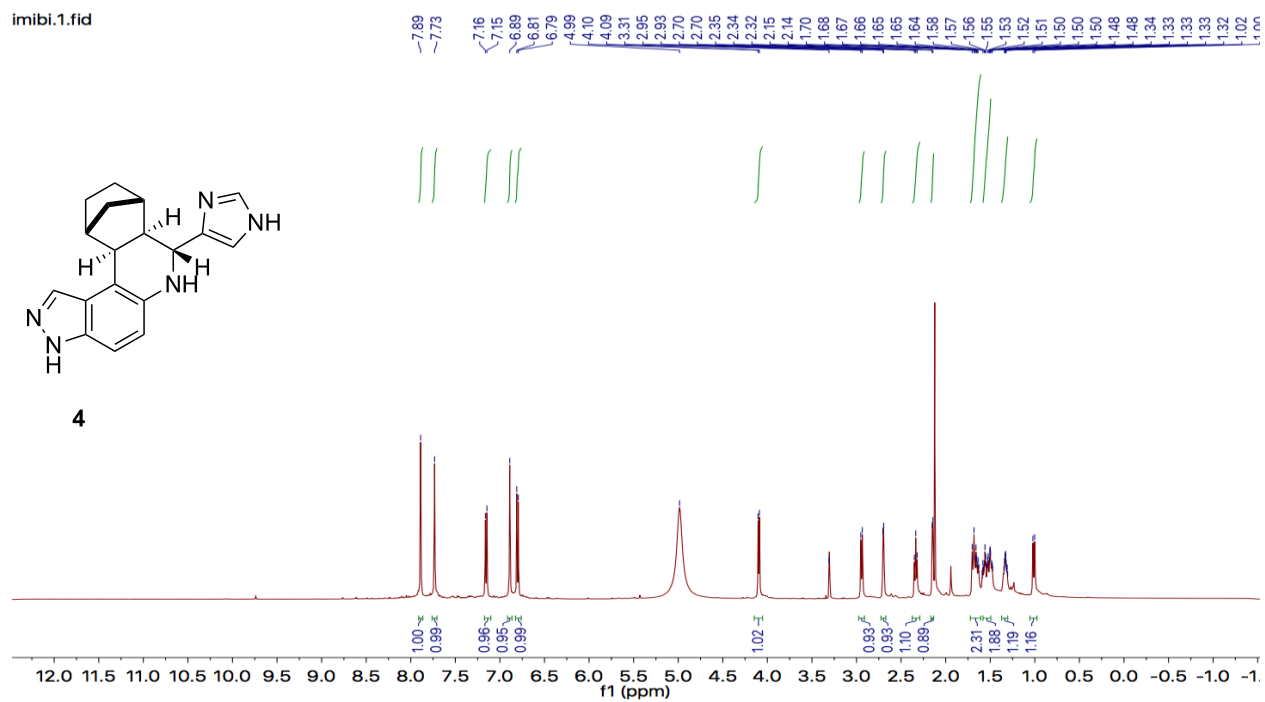

Figure S8:  $^{13}\text{C}$  spectra of compound 4 in methanol- $d_4$

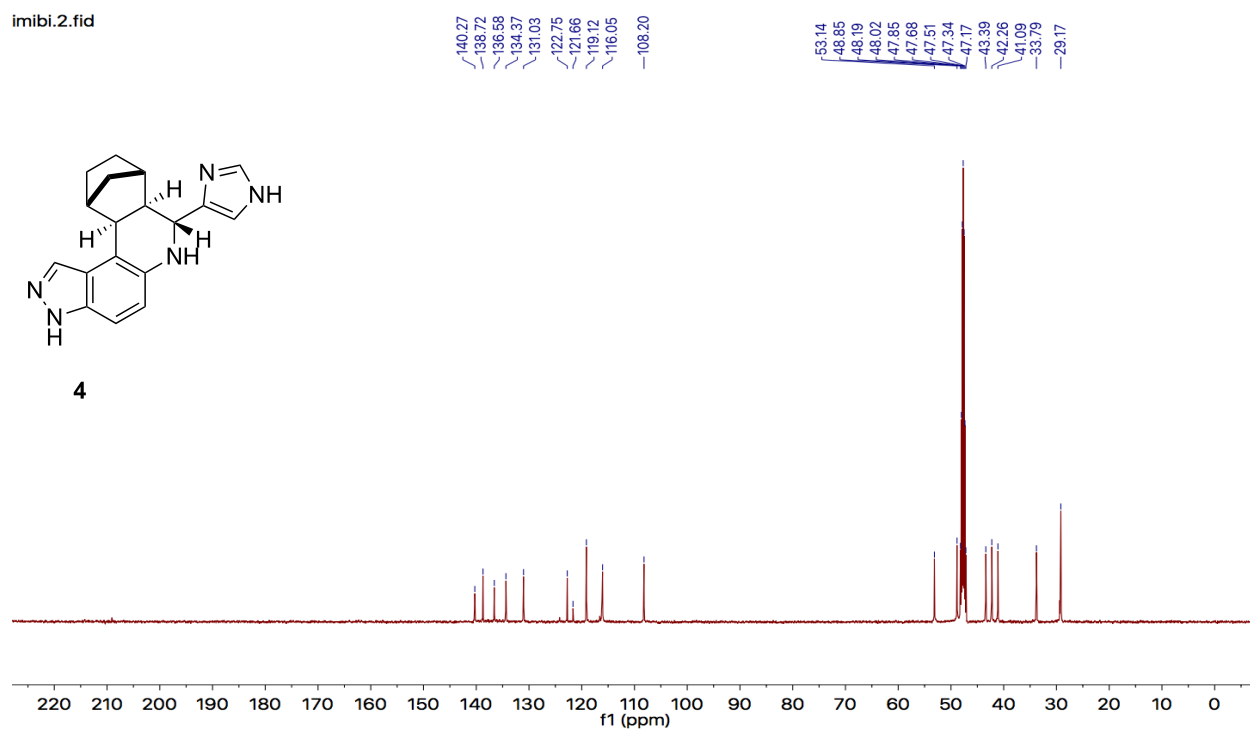

Figure S9: <sup>1</sup>H spectra of compound 5 in methanol-d<sub>4</sub>

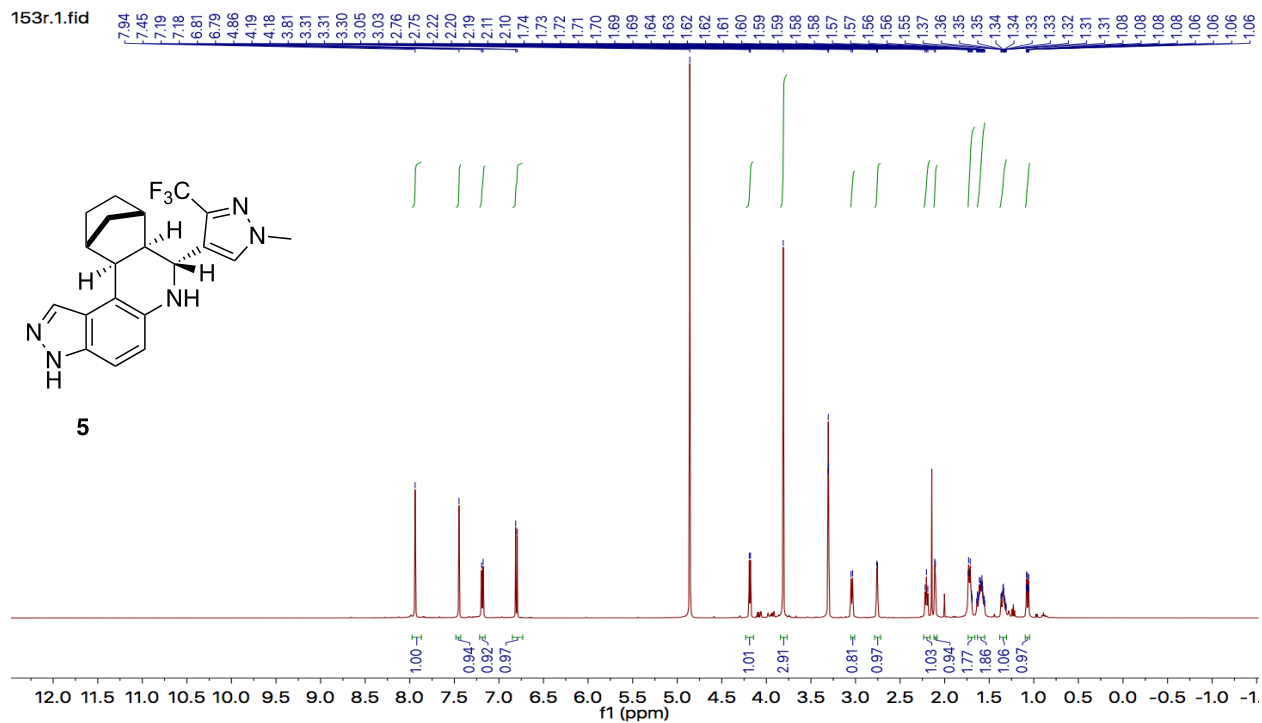

Figure S10: <sup>13</sup>C spectra of compound 5 in methanol-d<sub>4</sub>

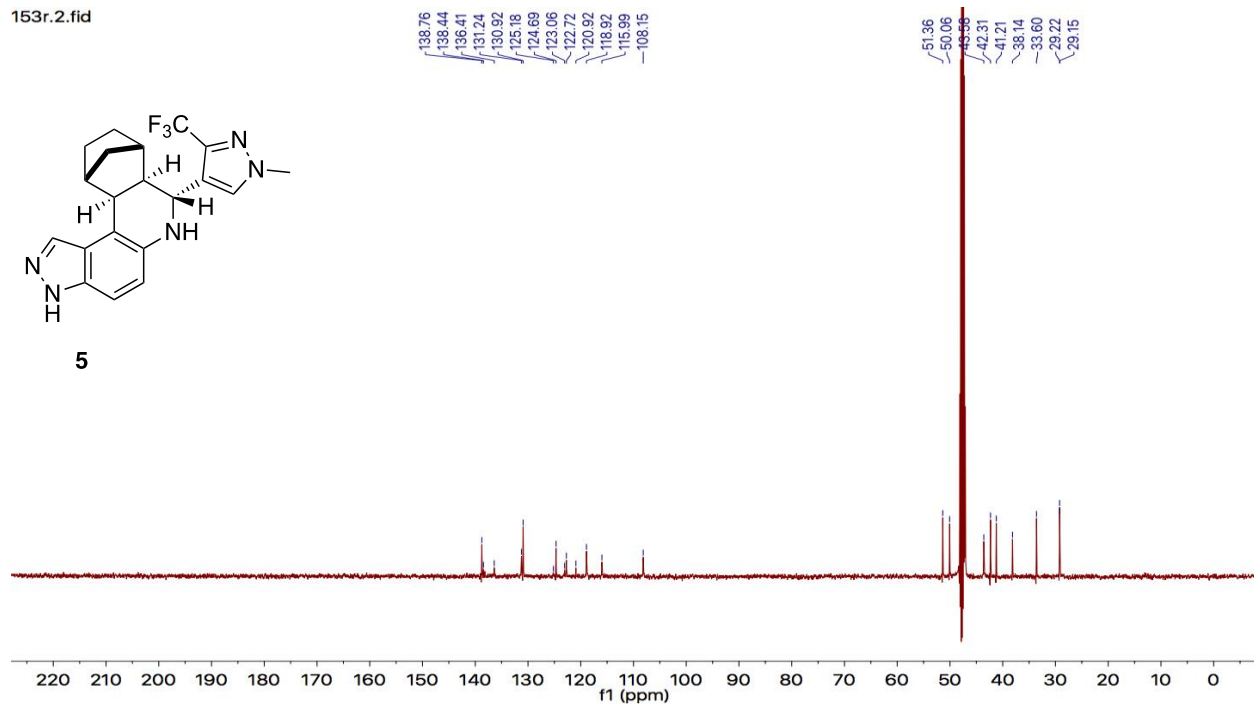

Figure S11: <sup>1</sup>H spectra of compound 6 in DMSO-*d*<sub>6</sub>

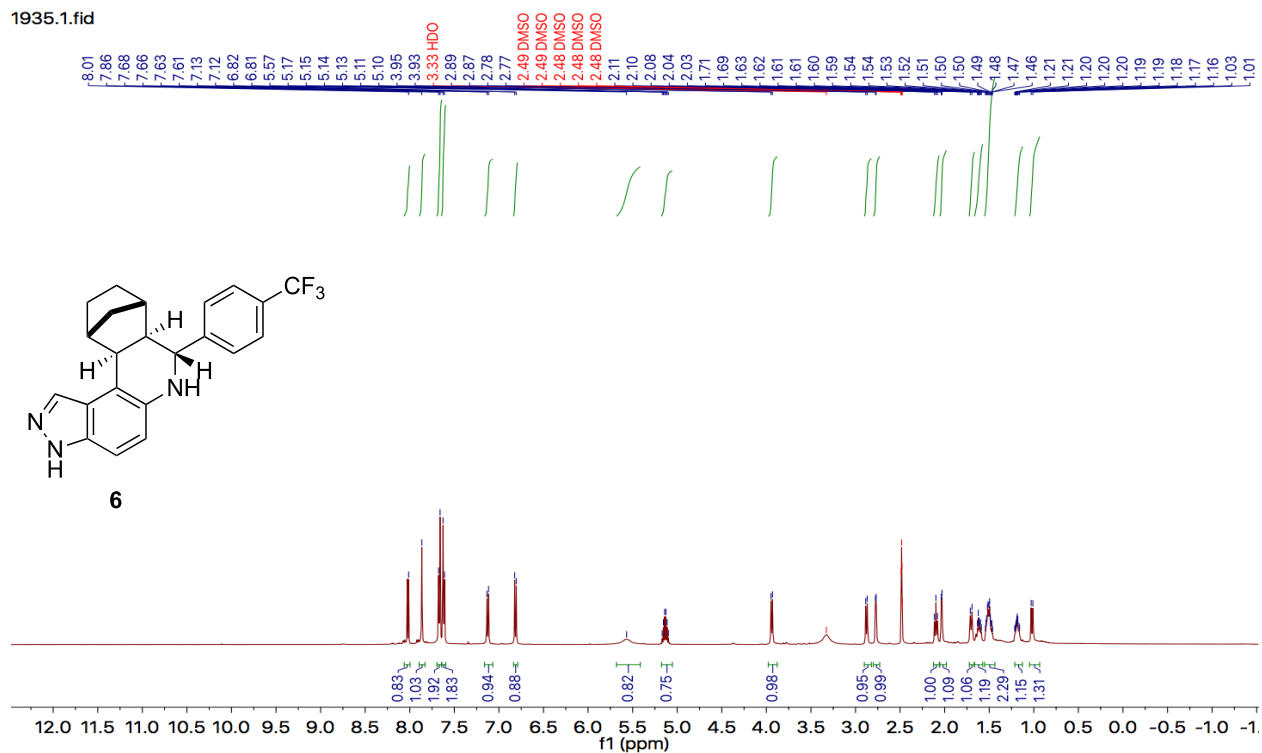

Figure S12: <sup>13</sup>C spectra of compound 6 in DMSO-*d*<sub>6</sub>

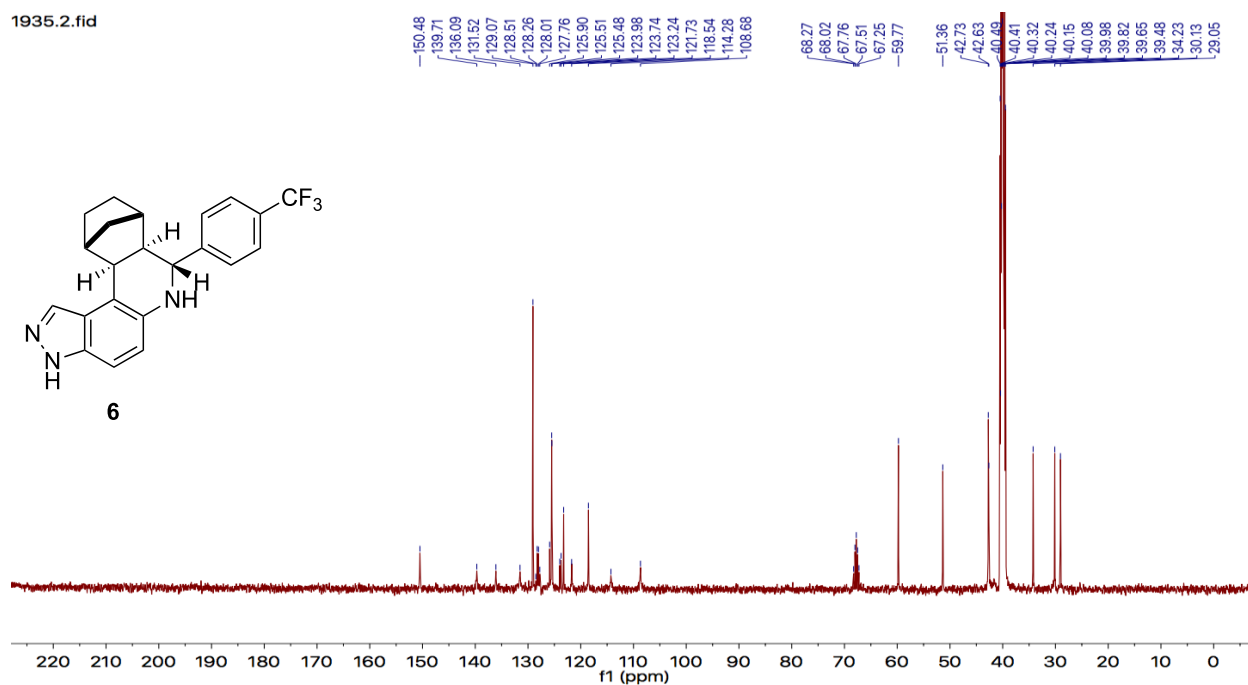

Figure S13:  $^1\text{H}$  spectra of compound **7** in  $\text{DMSO-}d_6$

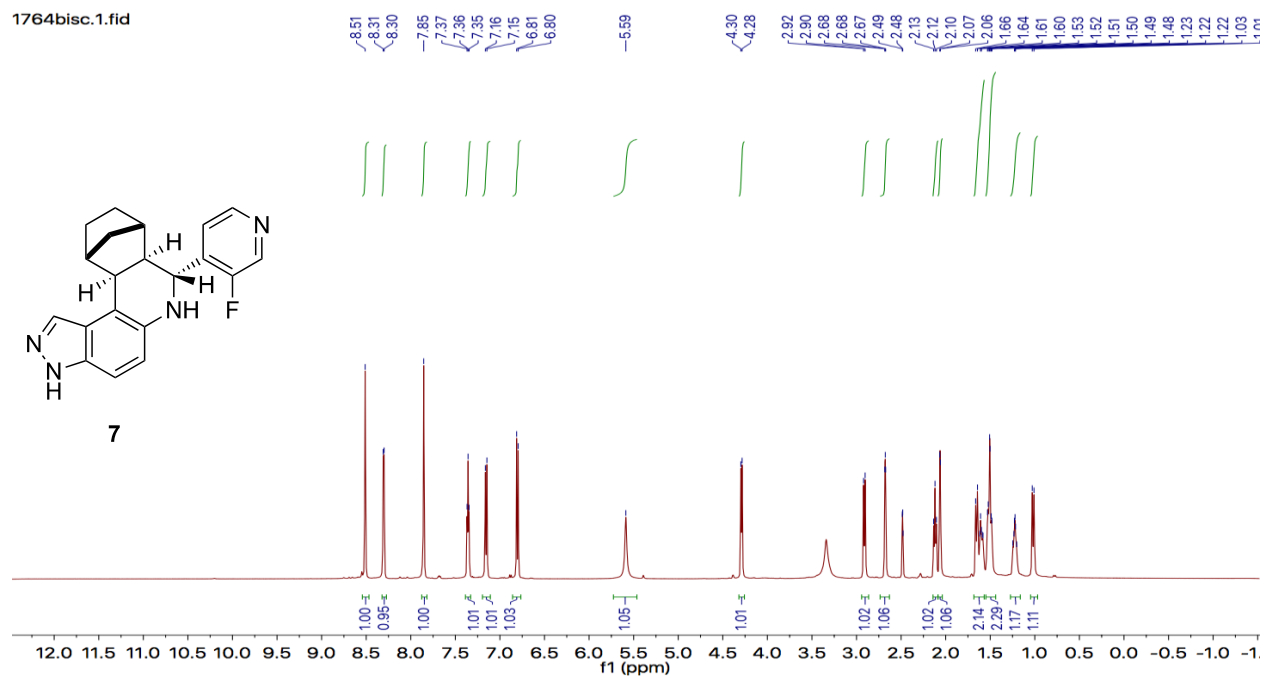

Figure S14:  $^{13}\text{C}$  spectra of compound **7** in  $\text{DMSO-}d_6$

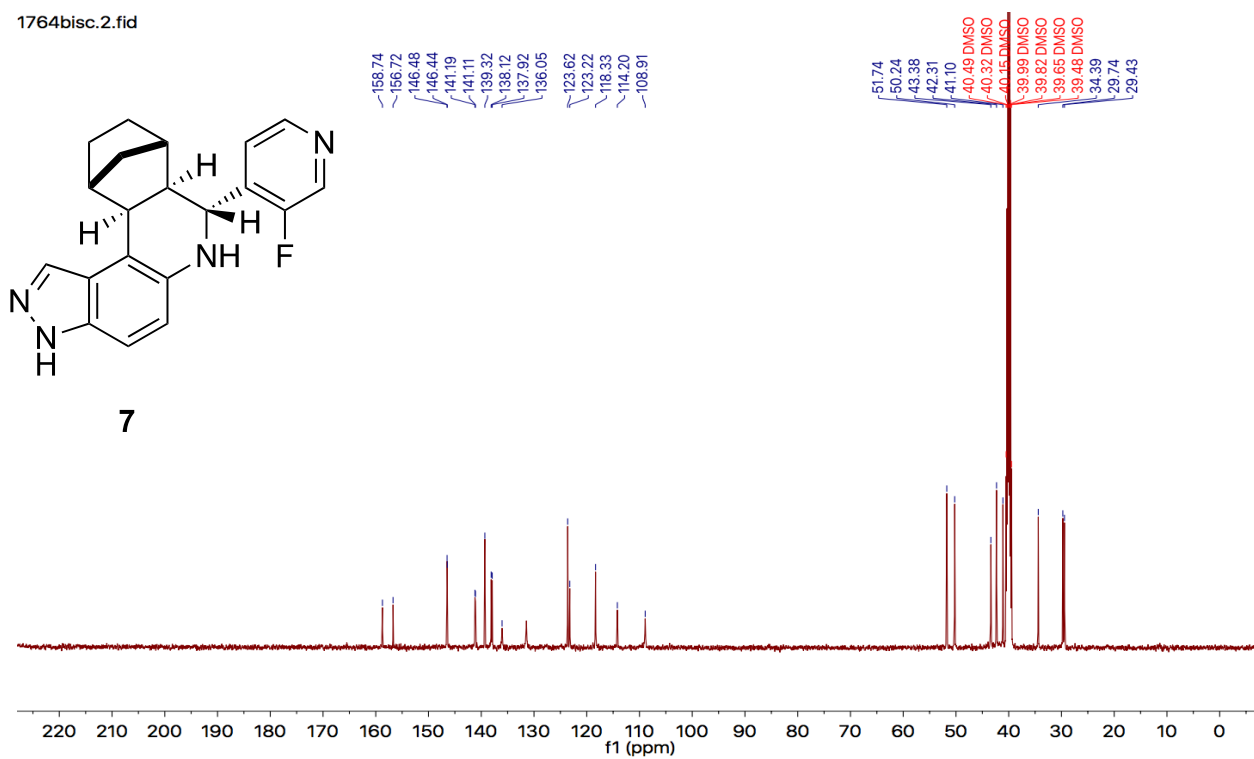

Figure S15:  $^1\text{H}$  spectra of compound **8** in methanol- $d_4$

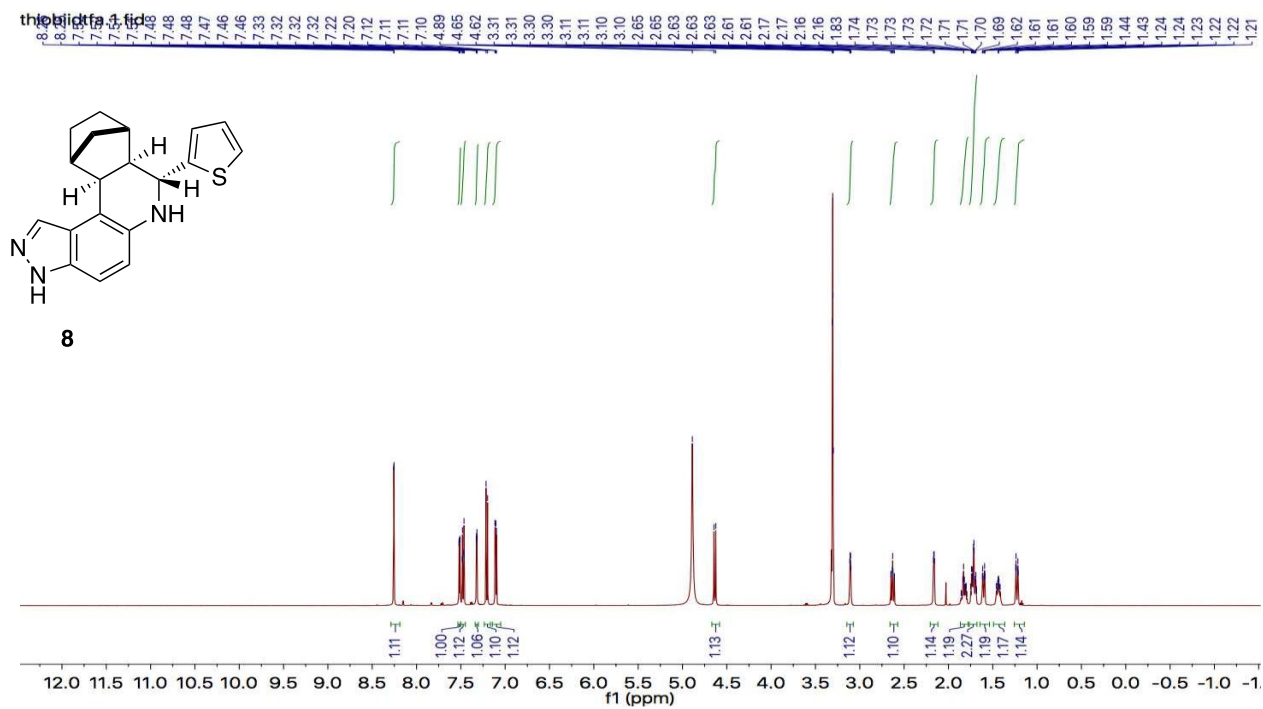

Figure S16:  $^{13}\text{C}$  spectra of compound **8** in methanol- $d_4$

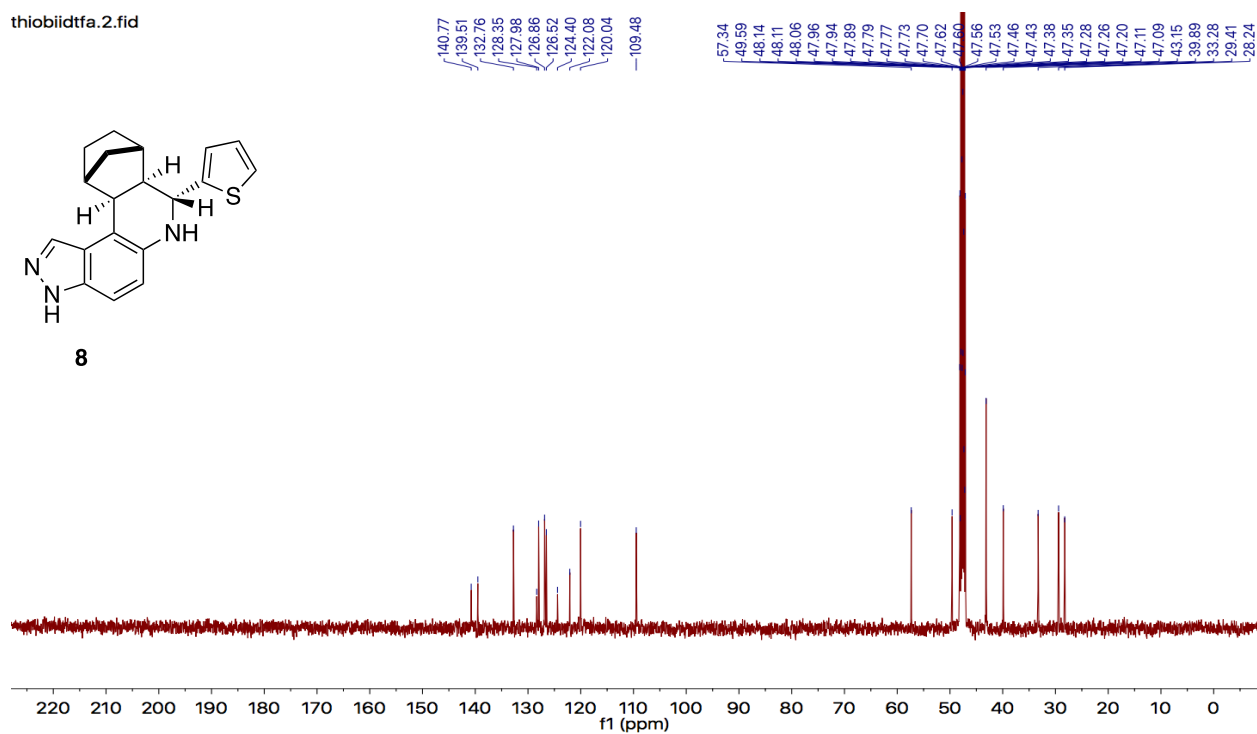

Figure S17:  $^1\text{H}$  spectra of compound **9** in methanol- $d_4$

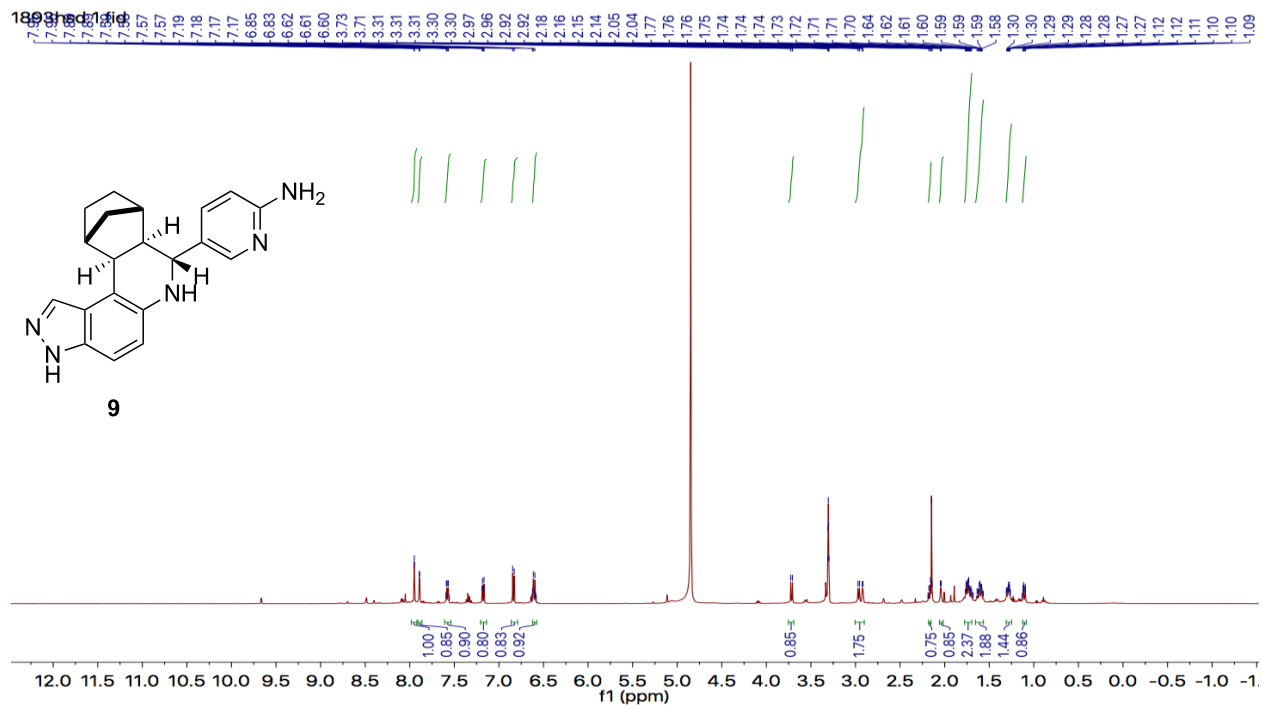

Figure S18:  $^{13}\text{C}$  spectra of compound **9** in methanol- $d_4$

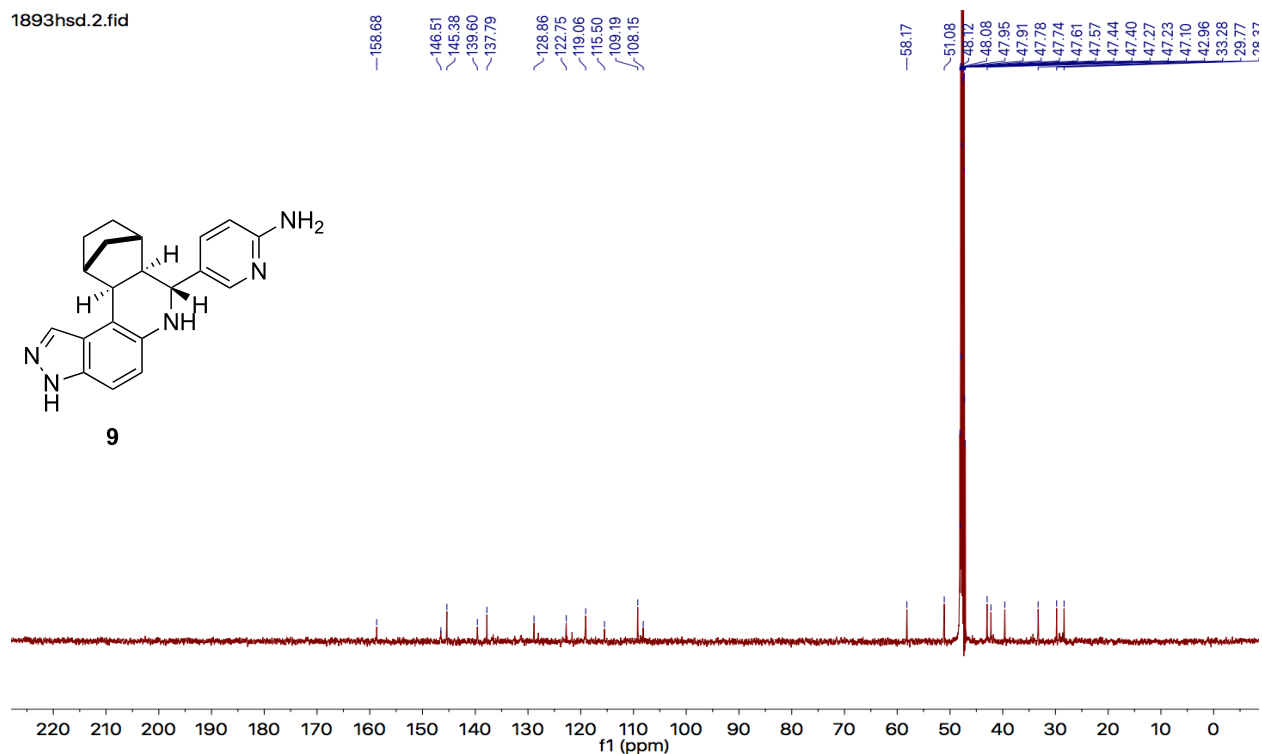



Figure S19:  $^1\text{H}$  spectra of compound 10 in  $\text{DMSO-}d_6$

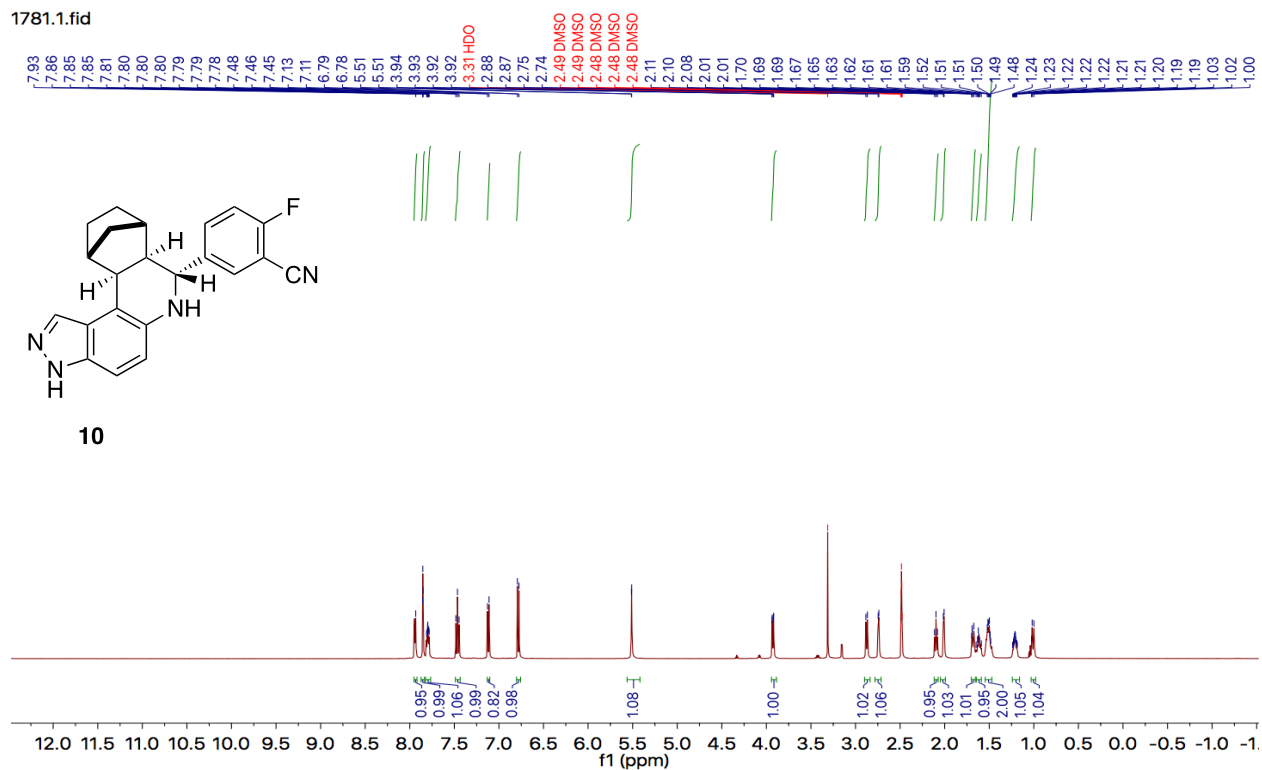

Figure S20:  $^{13}\text{C}$  spectra of compound 10 in  $\text{DMSO-}d_6$

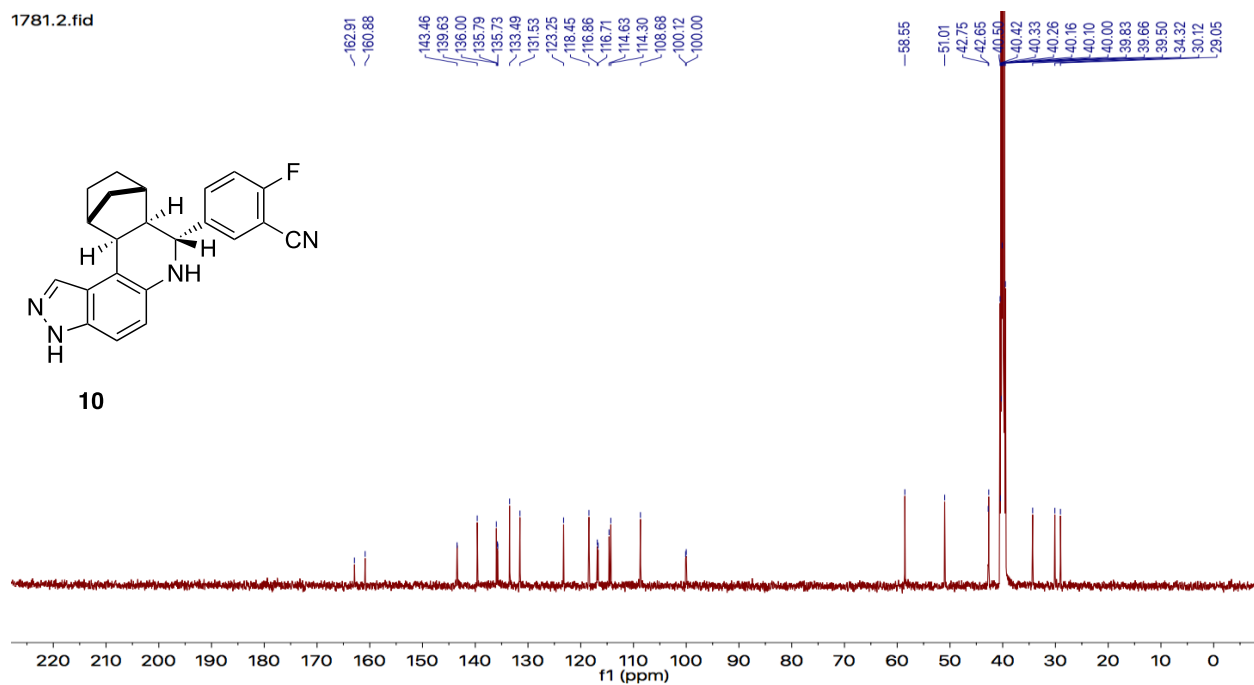

Figure S21:  $^1\text{H}$  spectra of compound 11 in  $\text{DMSO-}d_6$

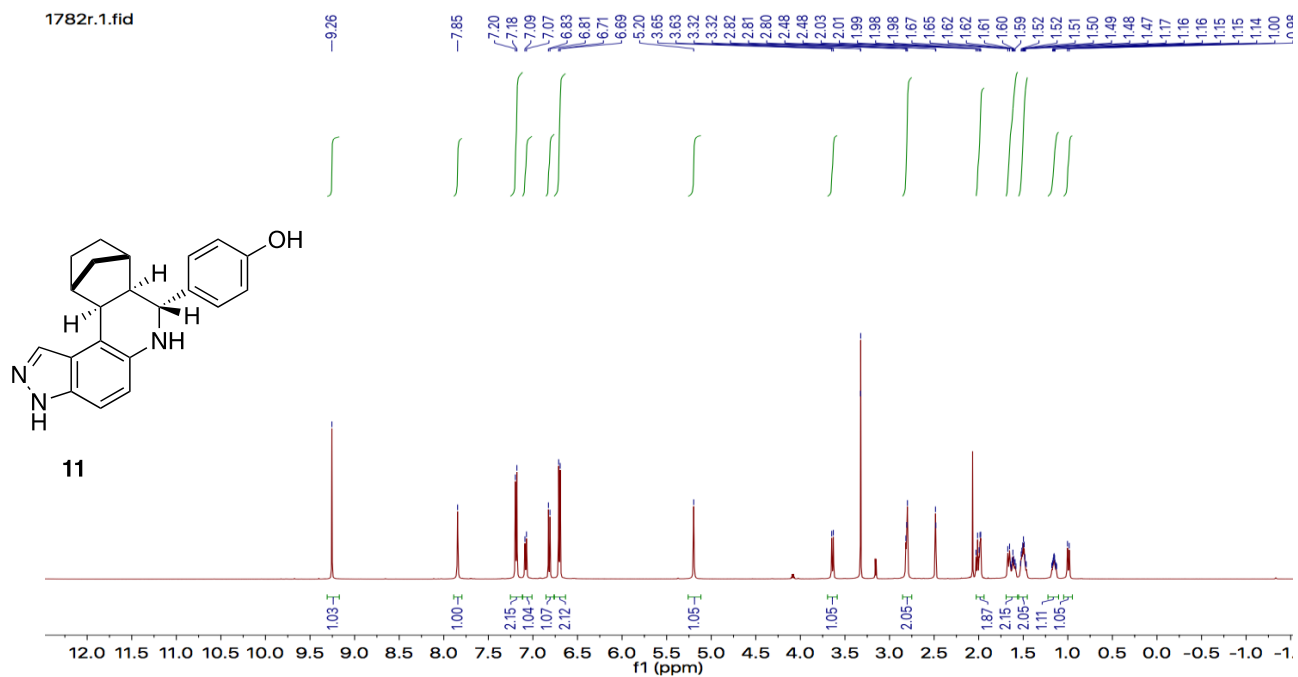

Figure S22:  $^{13}\text{C}$  spectra of compound 11 in  $\text{DMSO-}d_6$

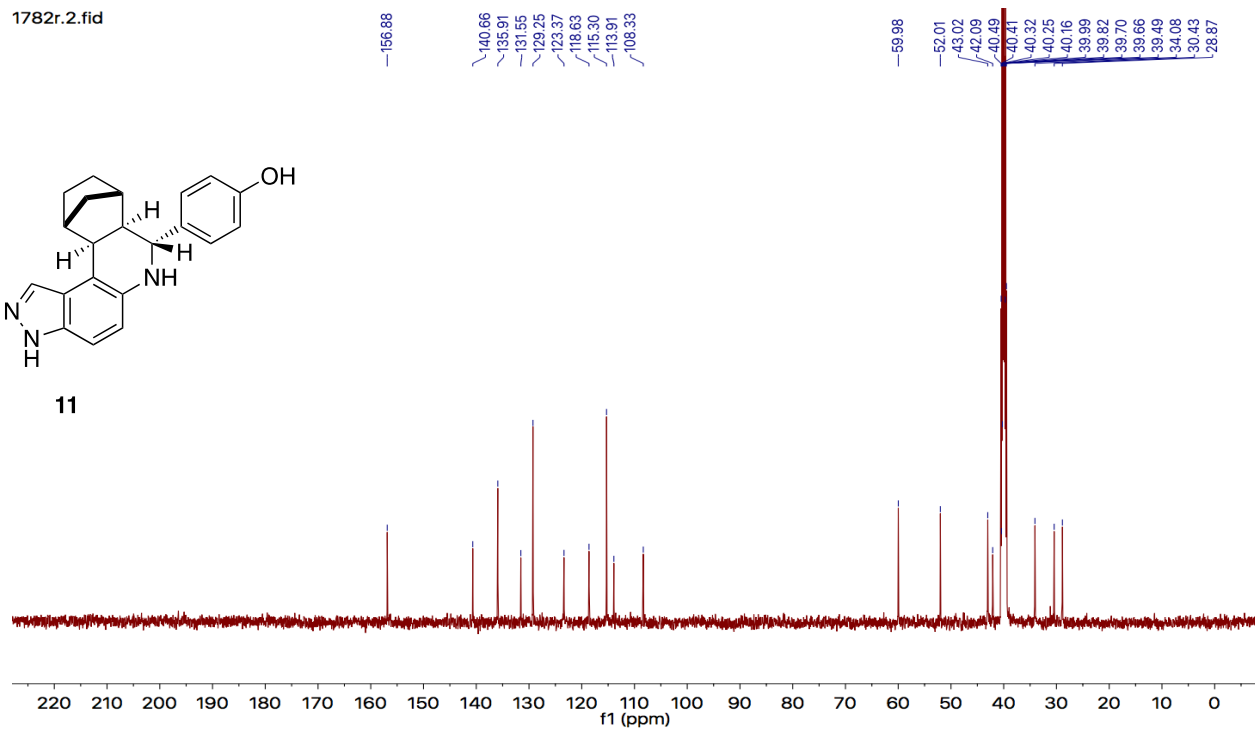

Figure S23:  $^1\text{H}$  spectra of compound 12 in  $\text{DMSO-}d_6$

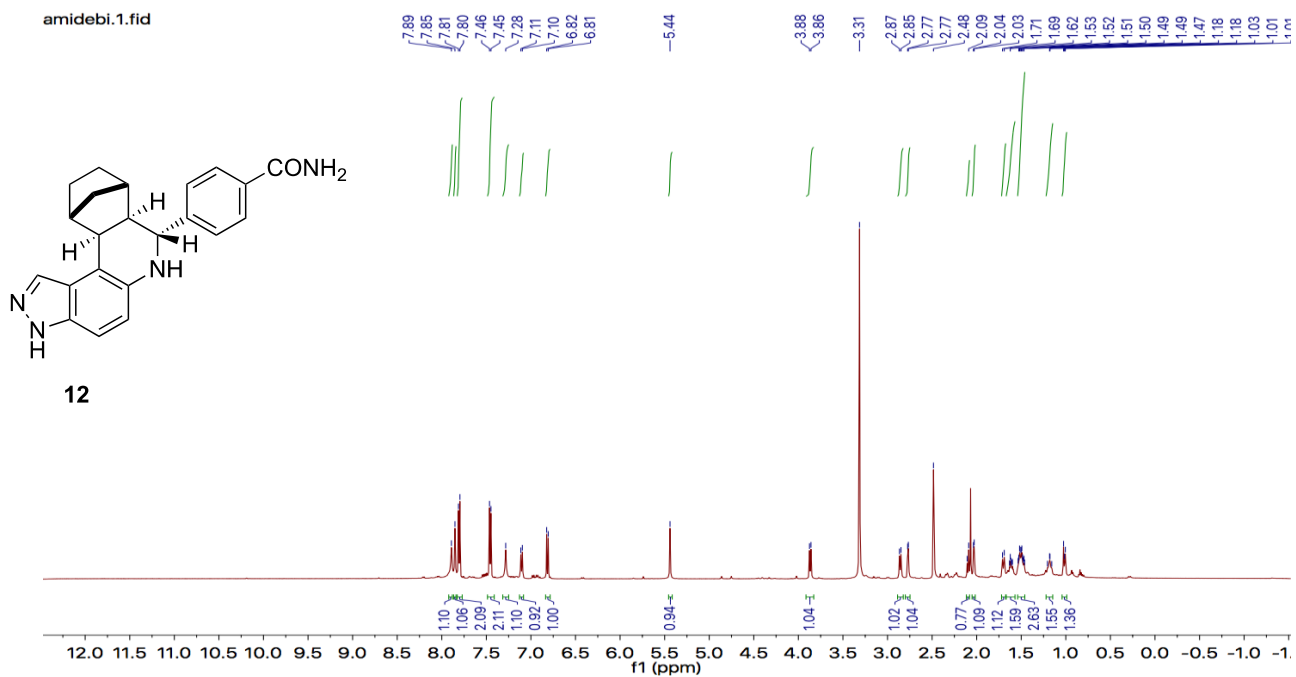

Figure S24:  $^{13}\text{C}$  spectra of compound 12 in  $\text{DMSO-}d_6$

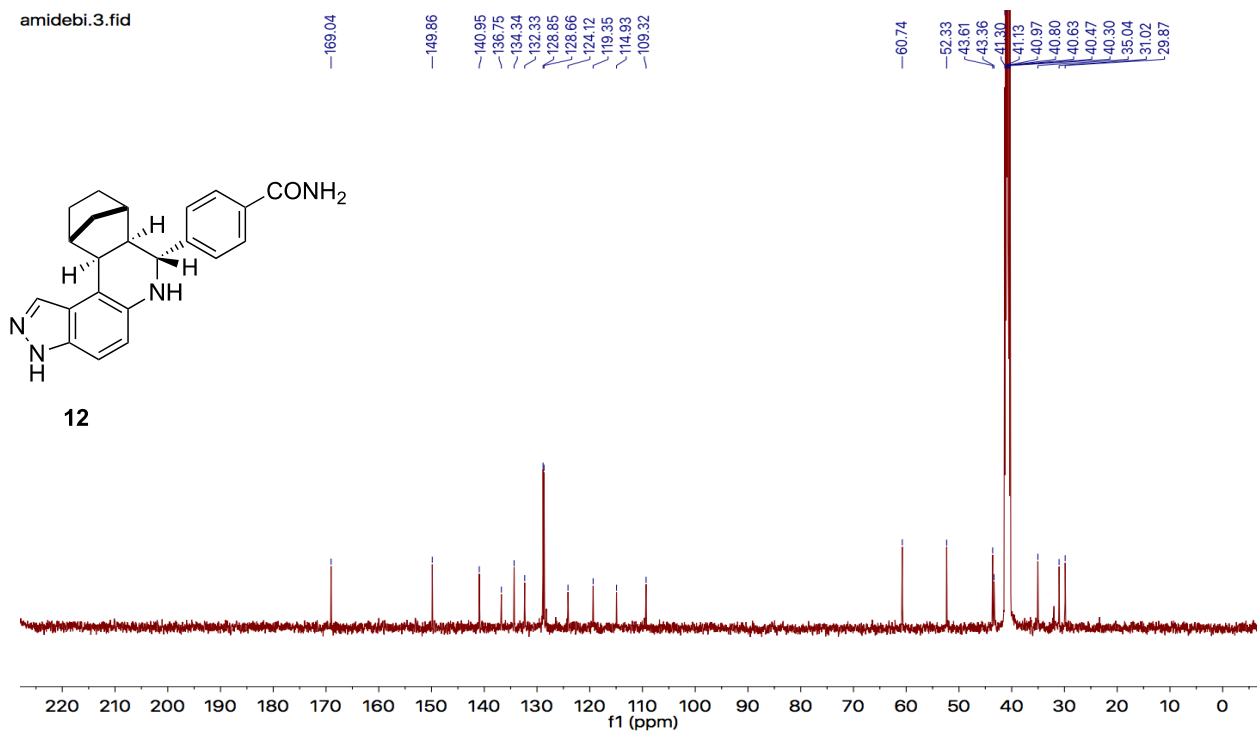

Figure S25: <sup>1</sup>H spectra of compound 13 in DMSO-d<sub>6</sub>

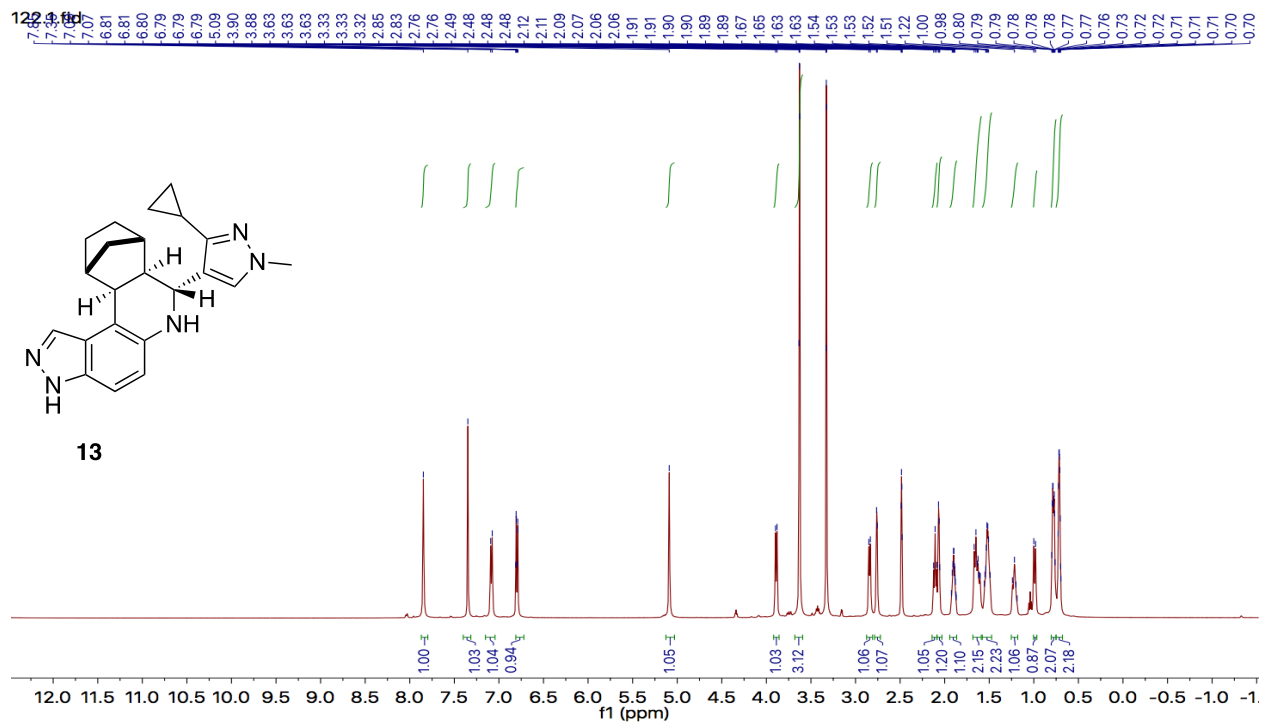

Figure S26: <sup>13</sup>C spectra of compound 13 in DMSO-d<sub>6</sub>

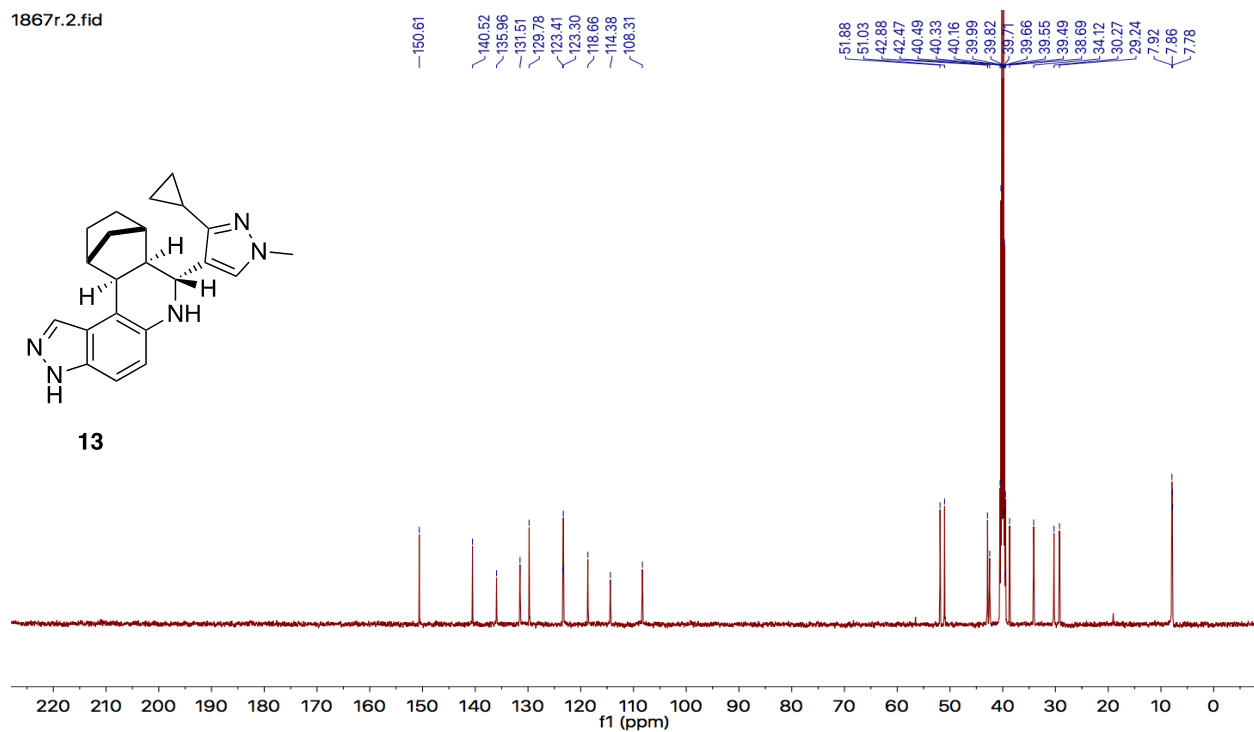

Figure S27:  $^1\text{H}$  spectra of compound 14 in  $\text{DMSO-}d_6$

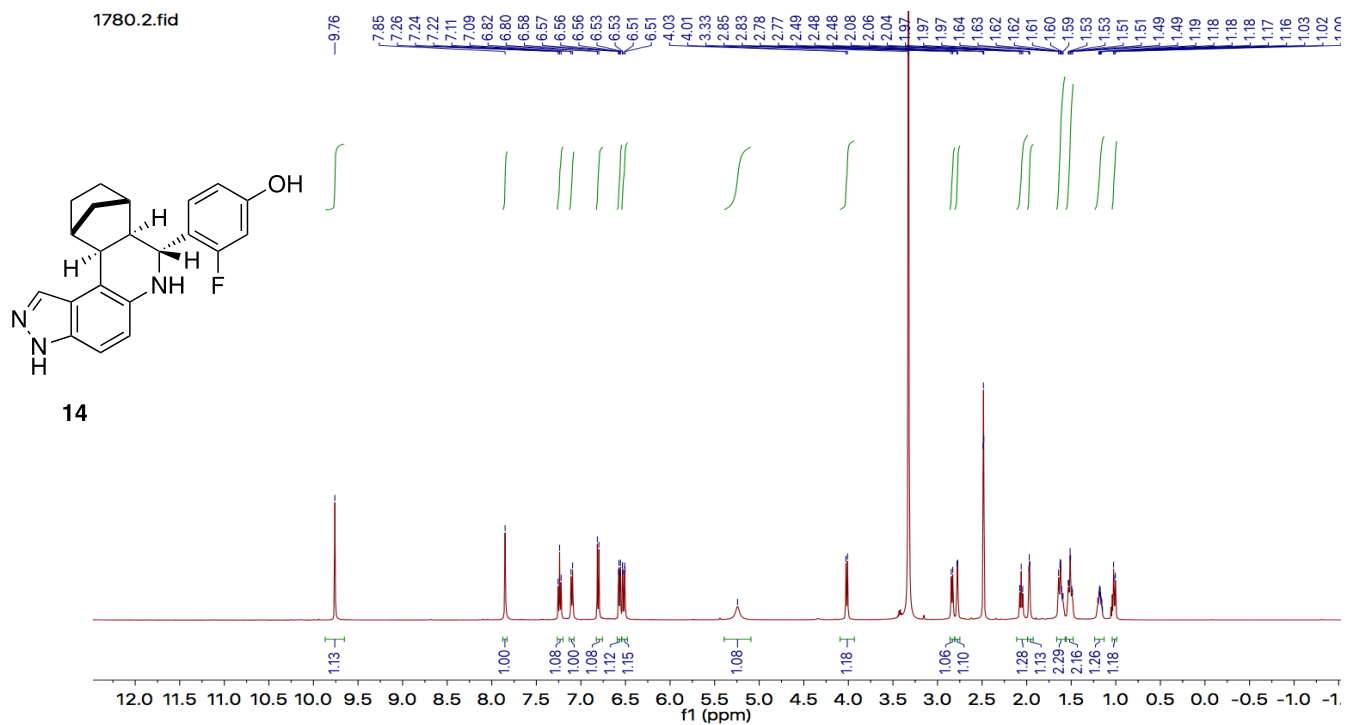

Figure S28:  $^{13}\text{C}$  spectra of compound 14 in  $\text{DMSO-}d_6$

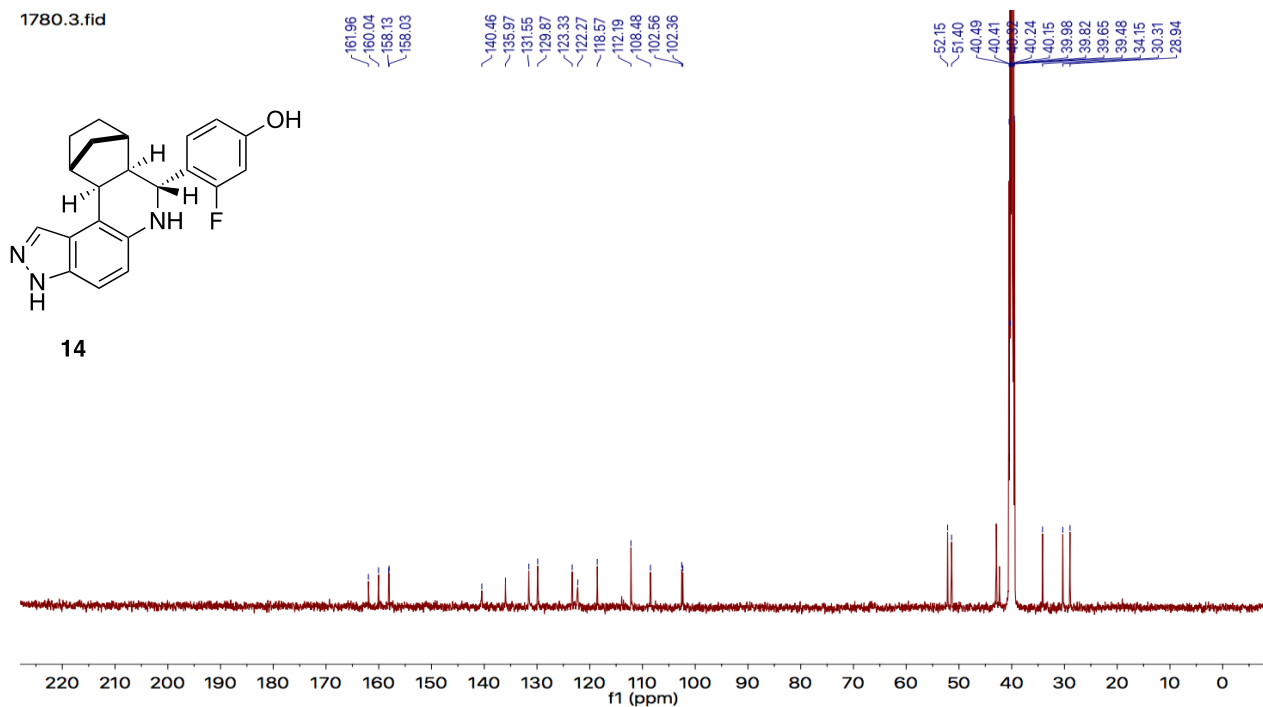

Figure S29:  $^1\text{H}$  spectra of compound **15** in  $\text{DMSO-}d_6$

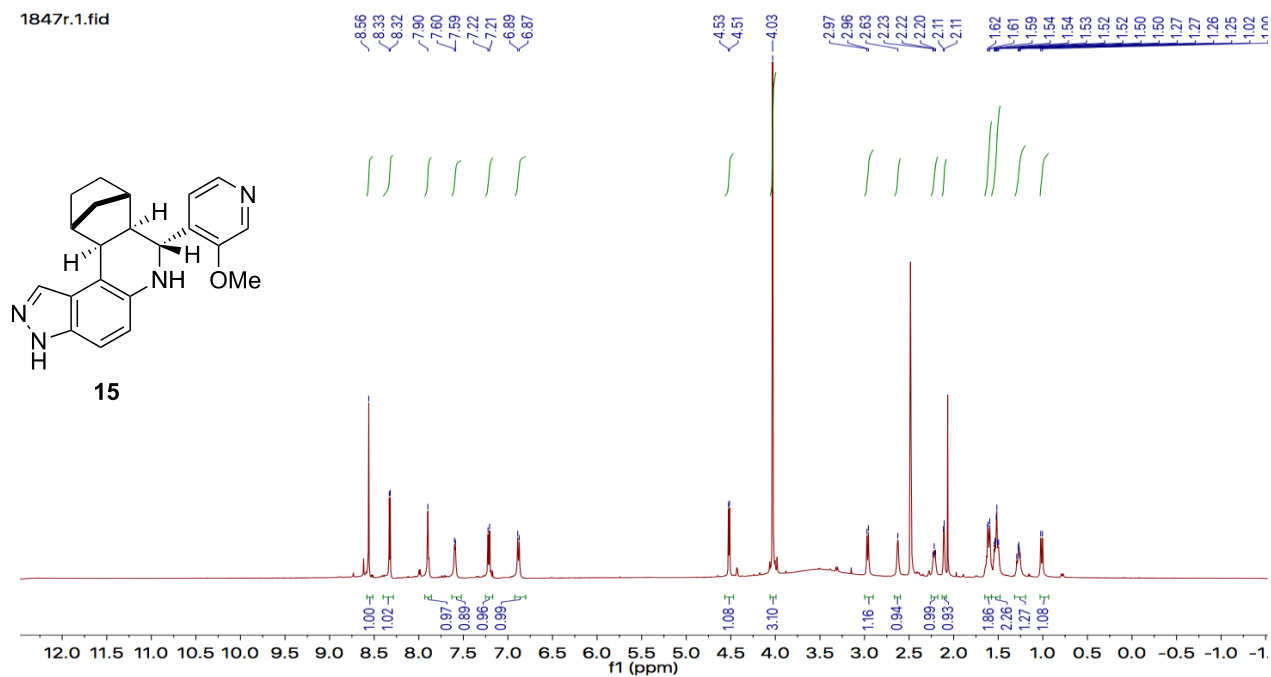

Figure S30:  $^{13}\text{C}$  spectra of compound **15** in  $\text{DMSO-}d_6$

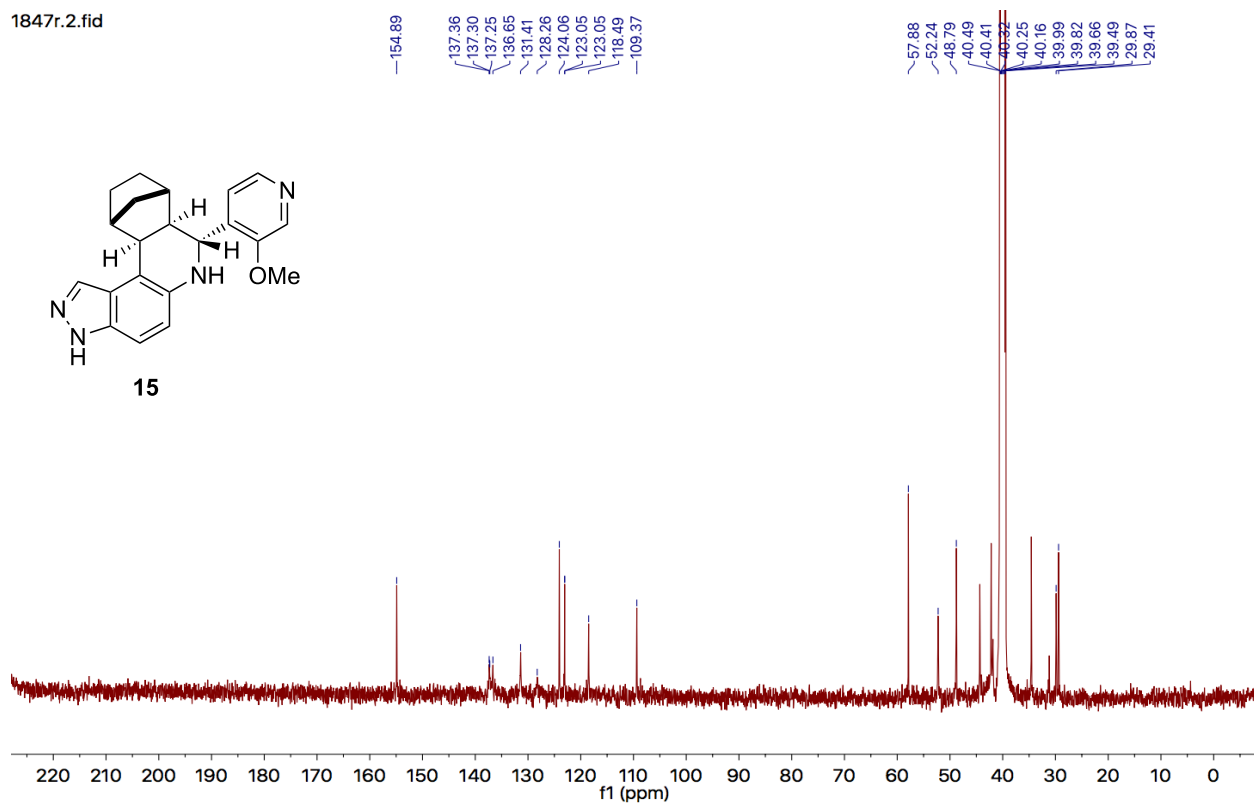

Figure S31:  $^1\text{H}$  spectra of compound 16 in  $\text{DMSO-}d_6$

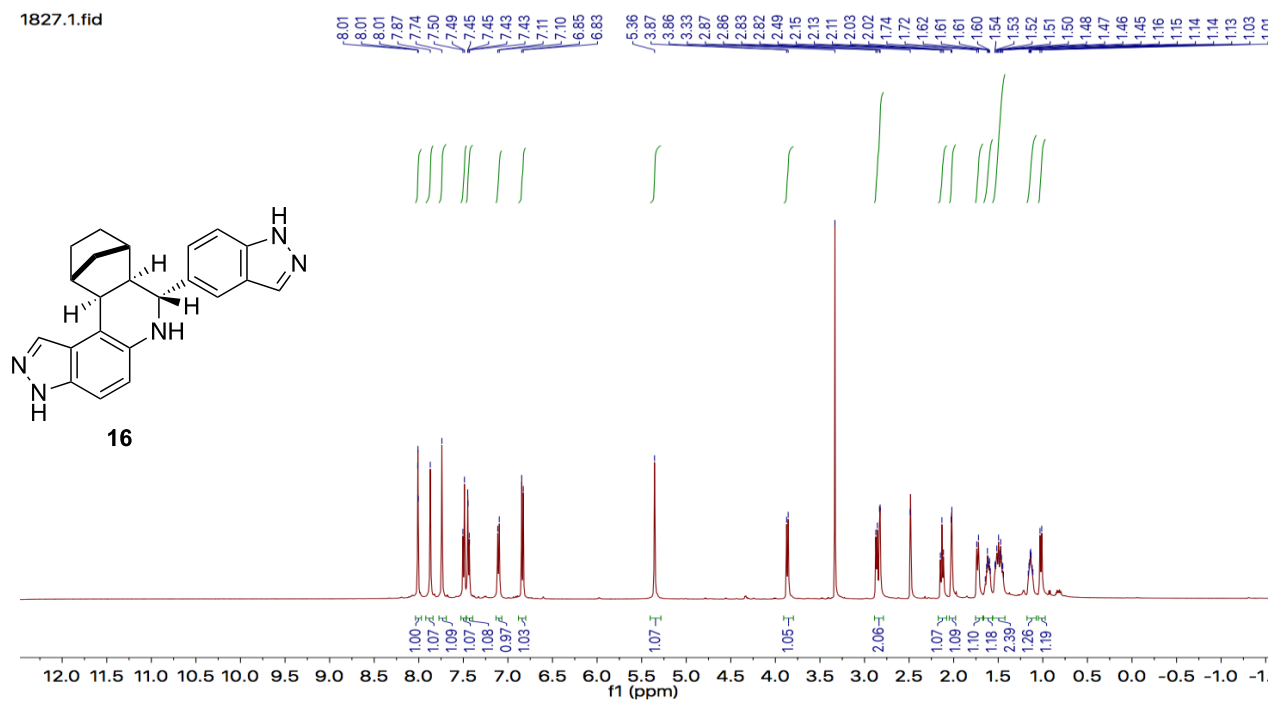

Figure S32:  $^{13}\text{C}$  spectra of compound 16 in  $\text{DMSO-}d_6$

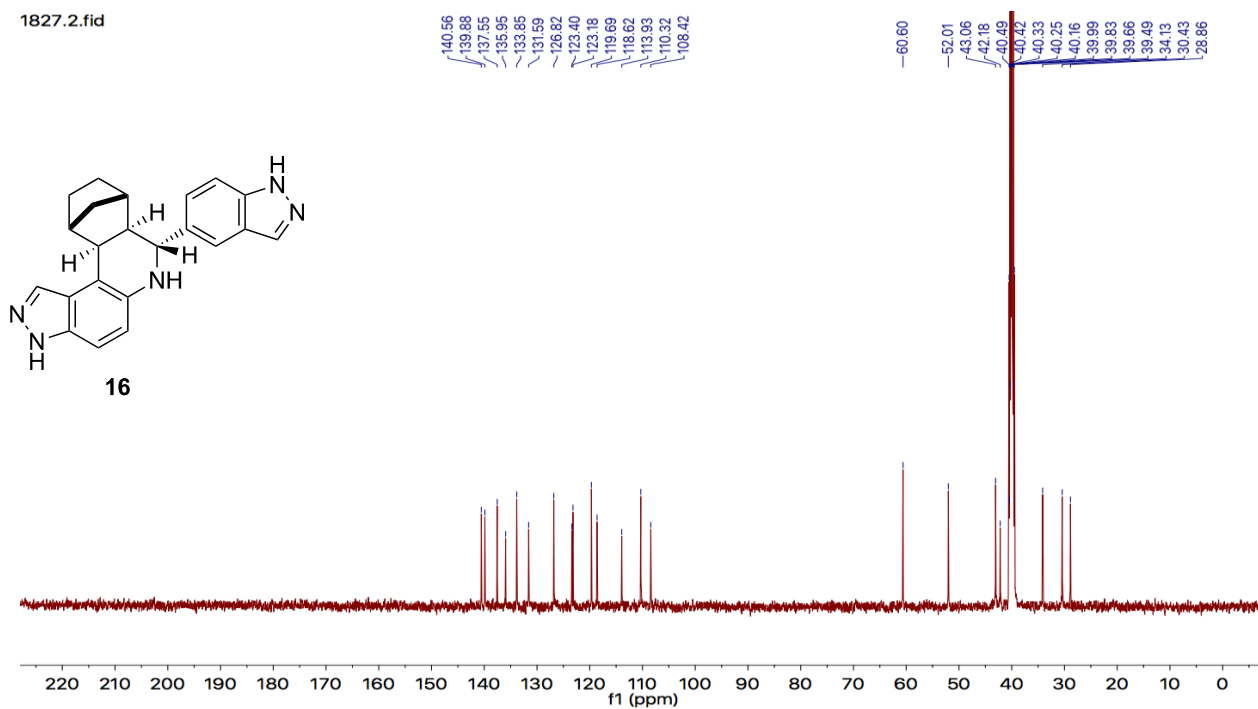

Figure S33:  $^1\text{H}$  spectra of compound 17 in  $\text{DMSO-}d_6$

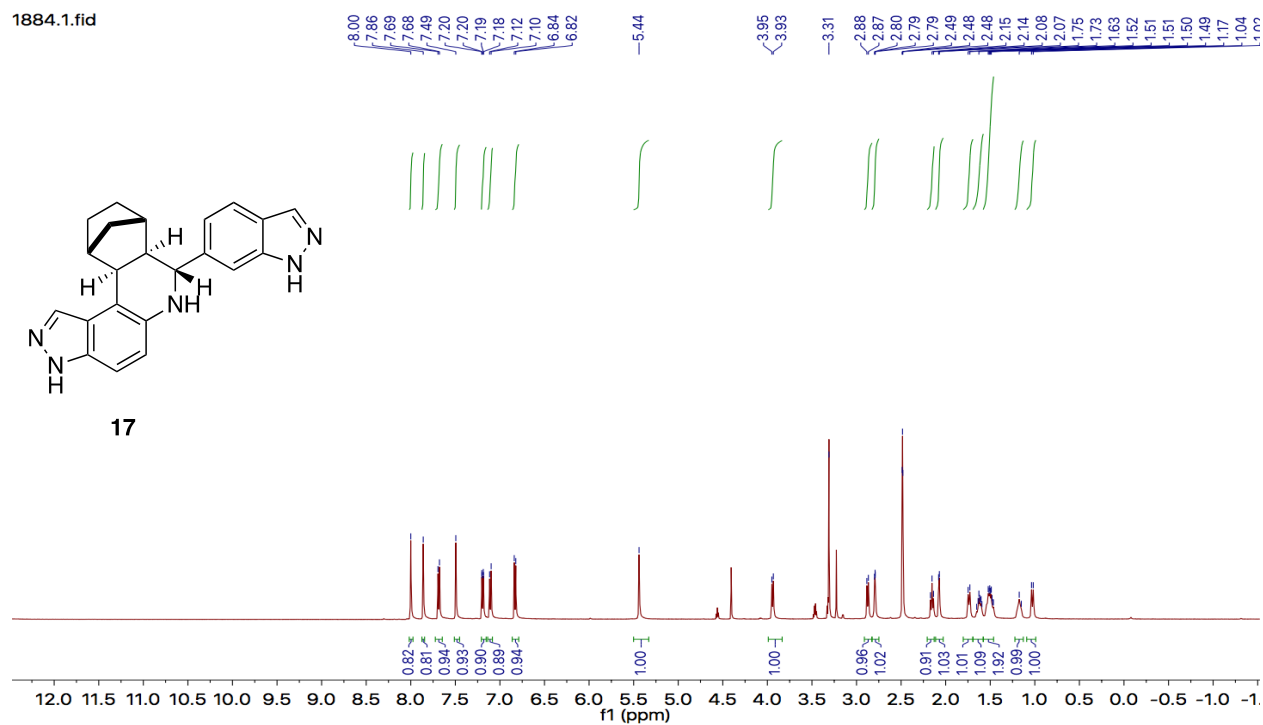

Figure S34:  $^{13}\text{C}$  spectra of compound 17 in  $\text{DMSO-}d_6$

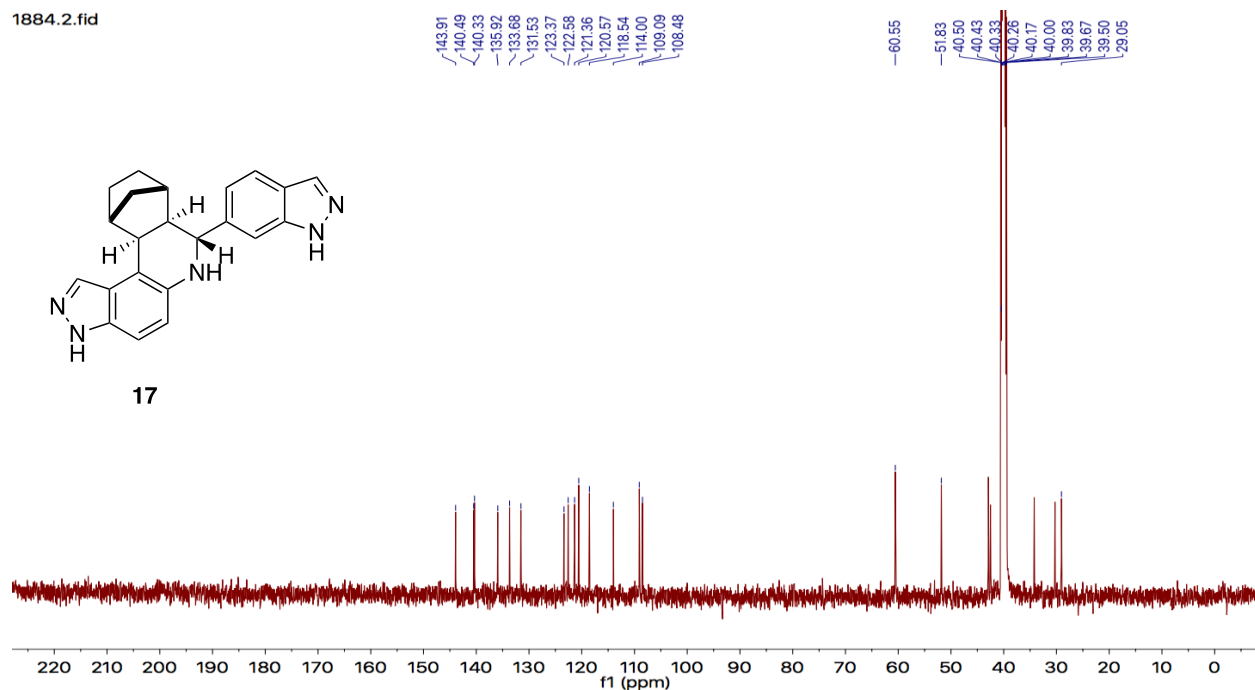



Figure S35:  $^1\text{H}$  spectra of compound HSD1787 in  $\text{DMSO-}d_6$

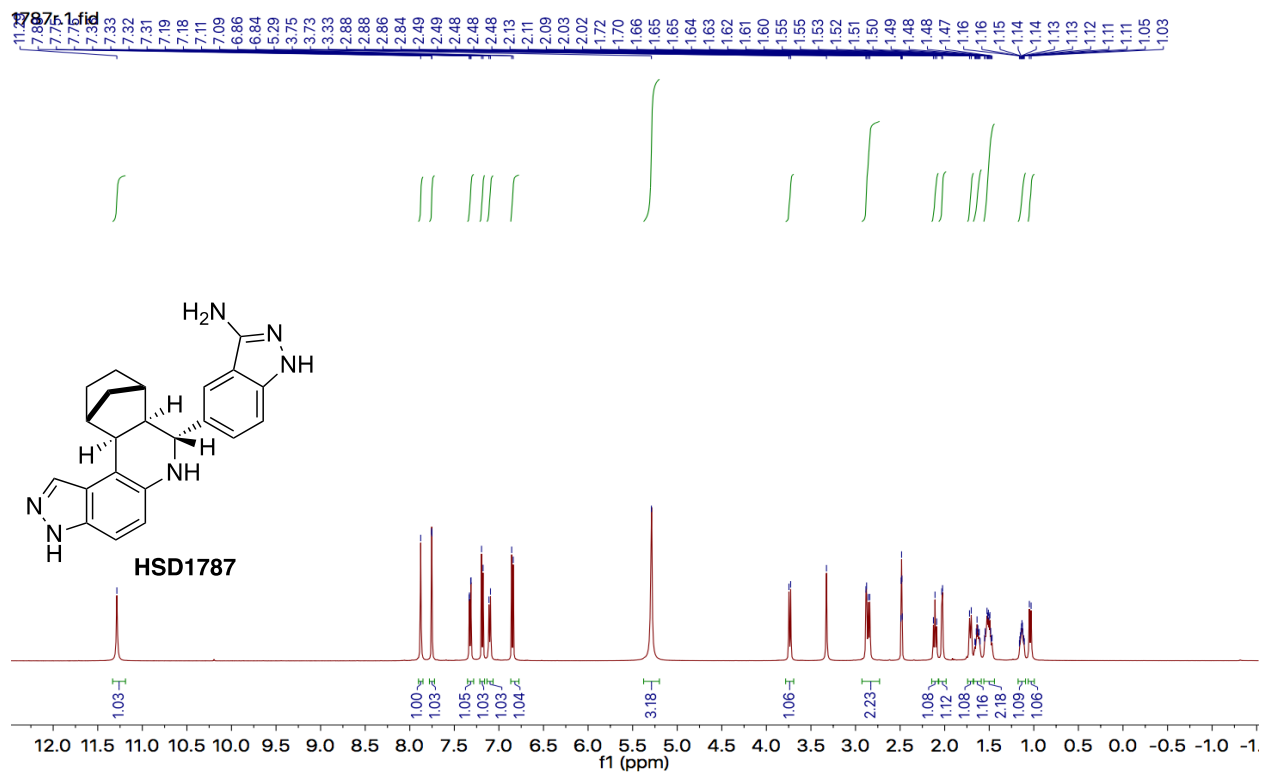

Figure S36:  $^{13}\text{C}$  spectra of compound HSD1787 in  $\text{DMSO-}d_6$

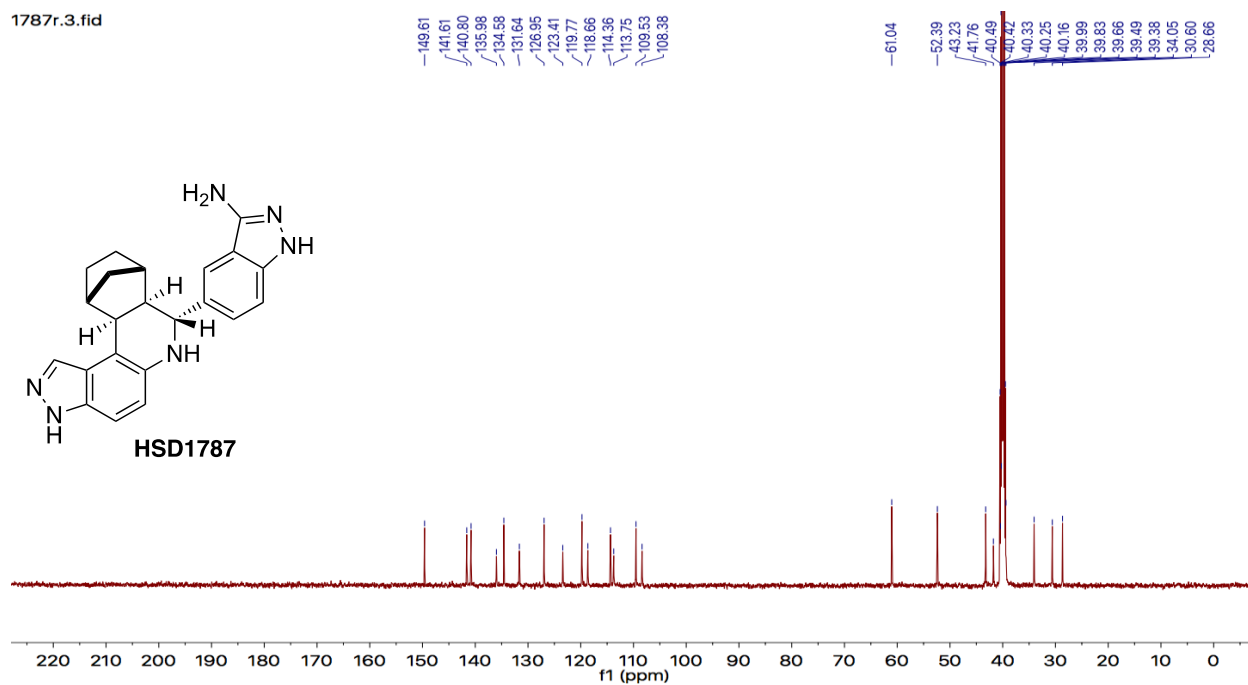

Figure S37:  $^1\text{H}$  spectra of compound 18 in  $\text{DMSO-}d_6$

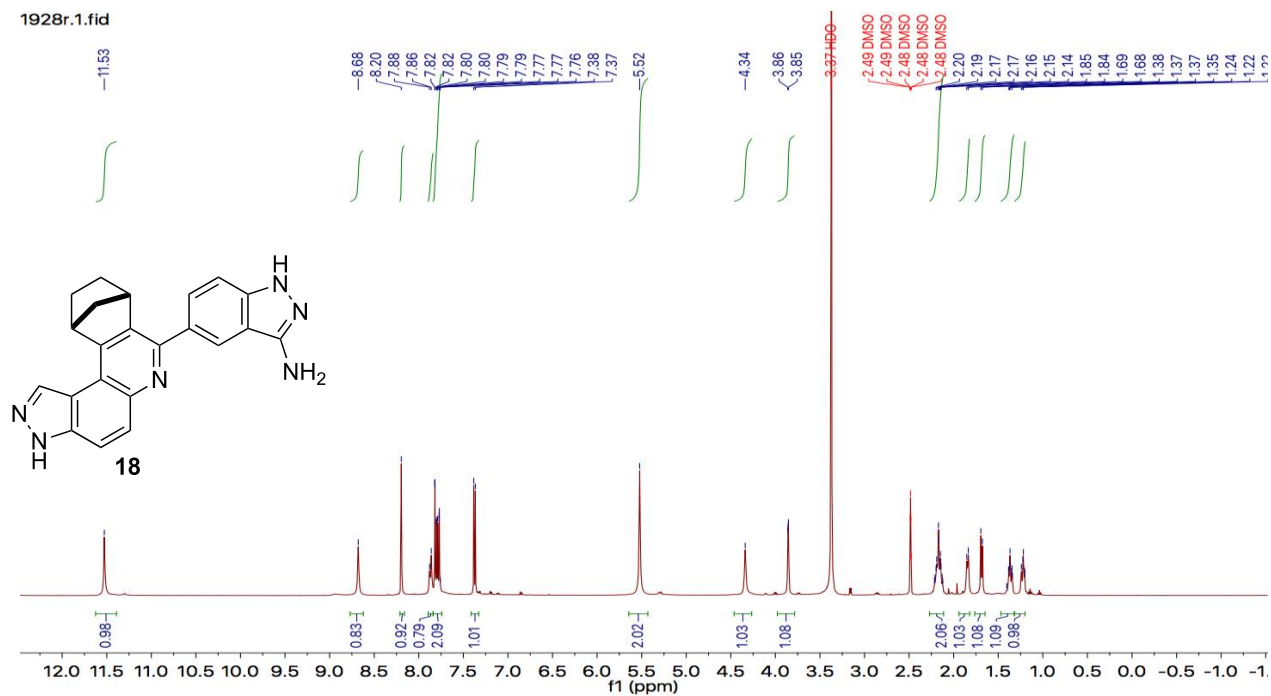

Figure S38:  $^{13}\text{C}$  spectra of compound 18 in  $\text{DMSO-}d_6$

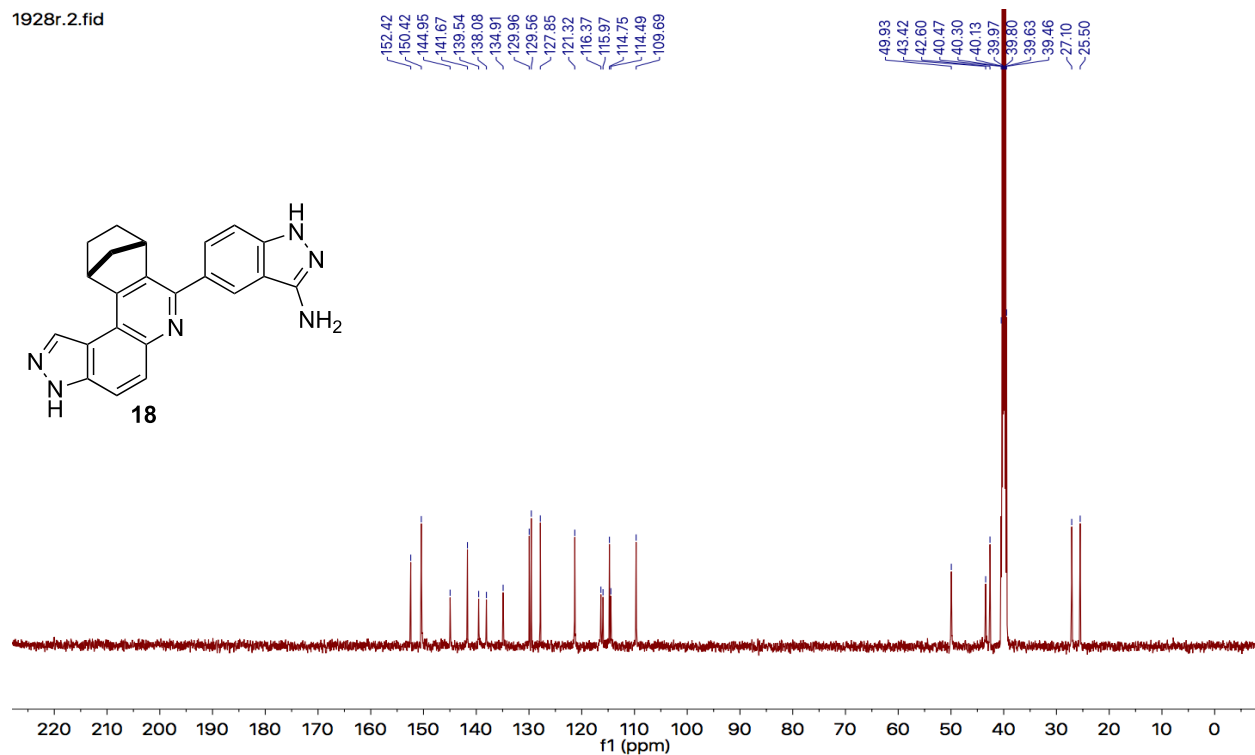

Figure S39:  $^1\text{H}$  spectra of compound S-1 in  $\text{DMSO-}d_6$

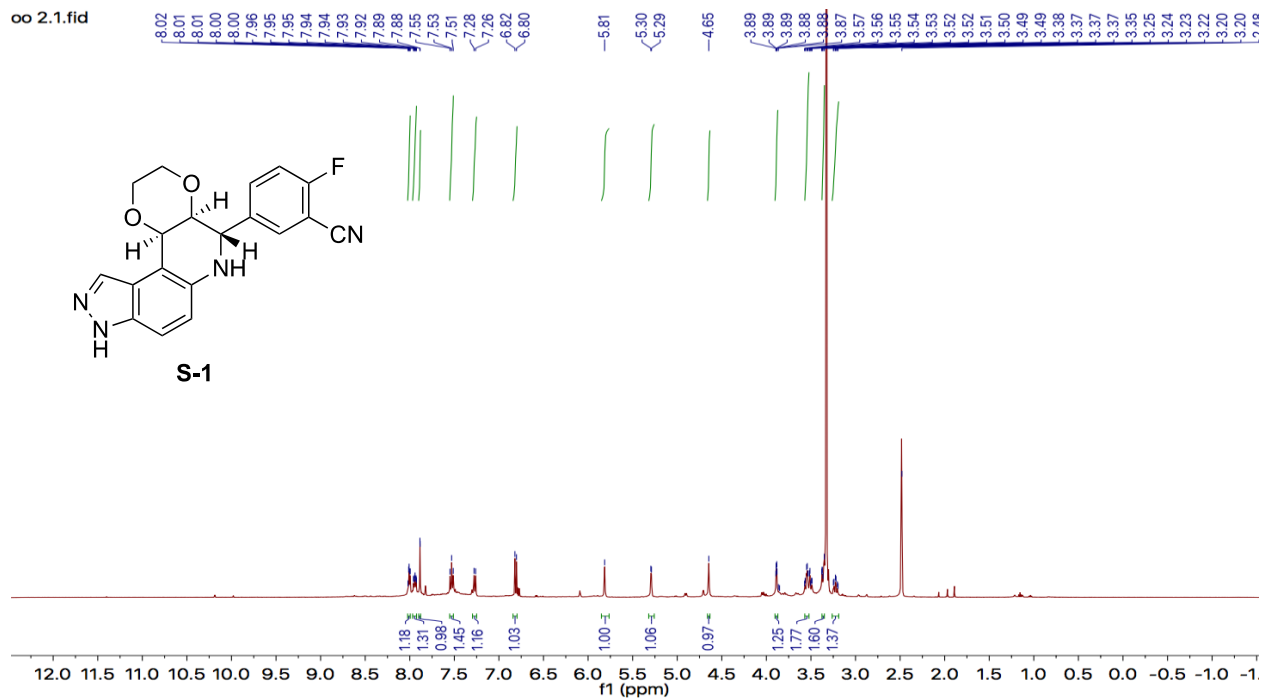

Figure S40:  $^{13}\text{C}$  spectra of compound S-1 in  $\text{DMSO-}d_6$

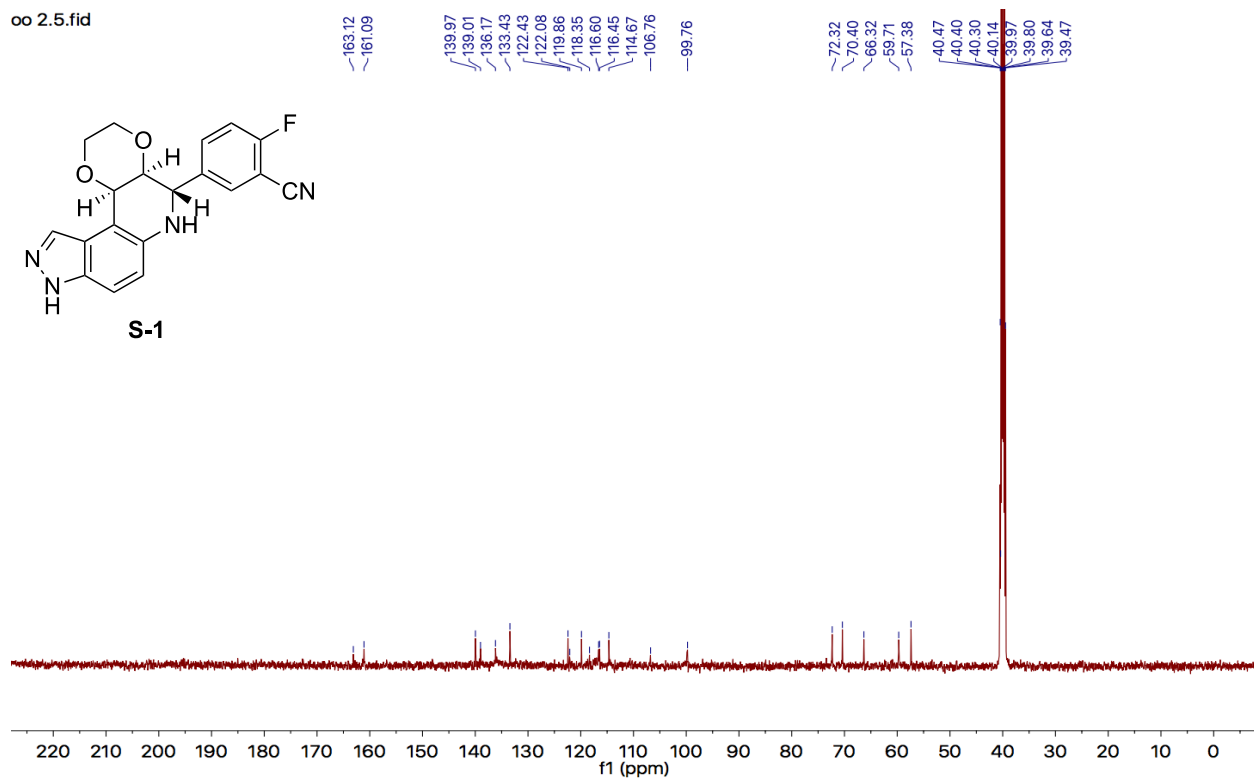

Figure S41:  $^1\text{H}$  spectra of compound 19 in  $\text{DMSO-}d_6$

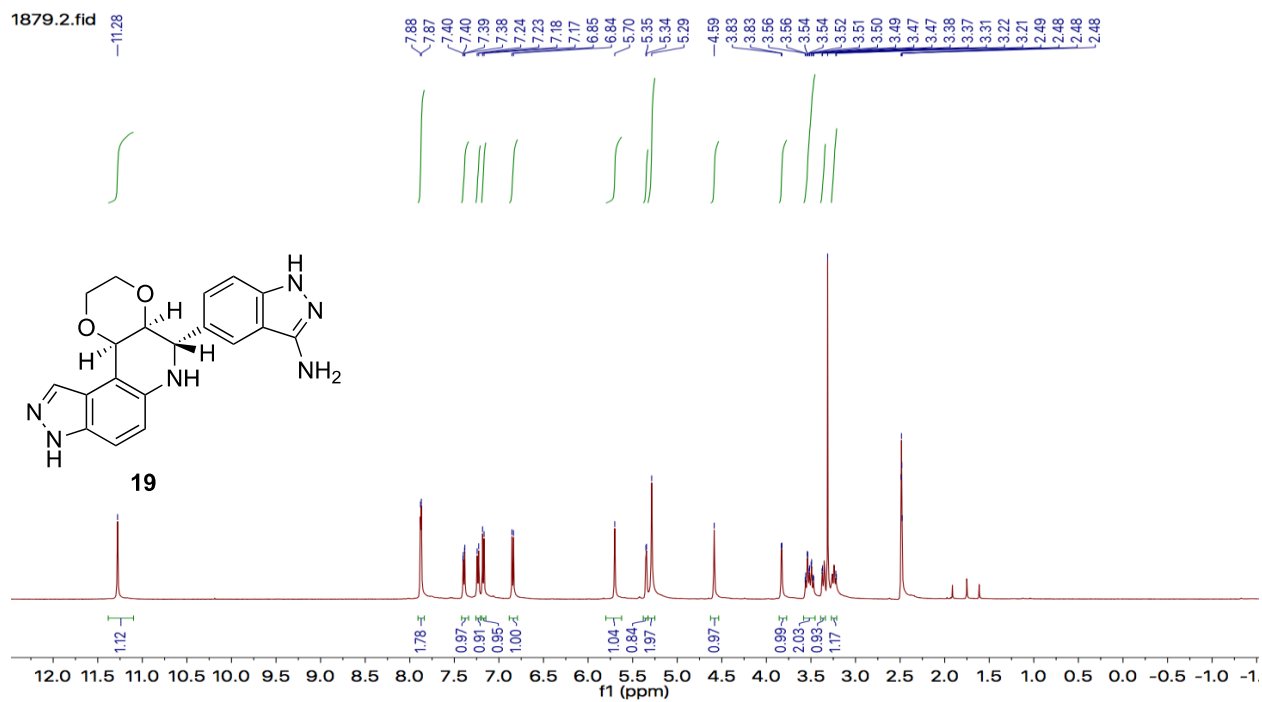

Figure S42:  $^{13}\text{C}$  spectra of compound 19 in  $\text{DMSO-}d_6$

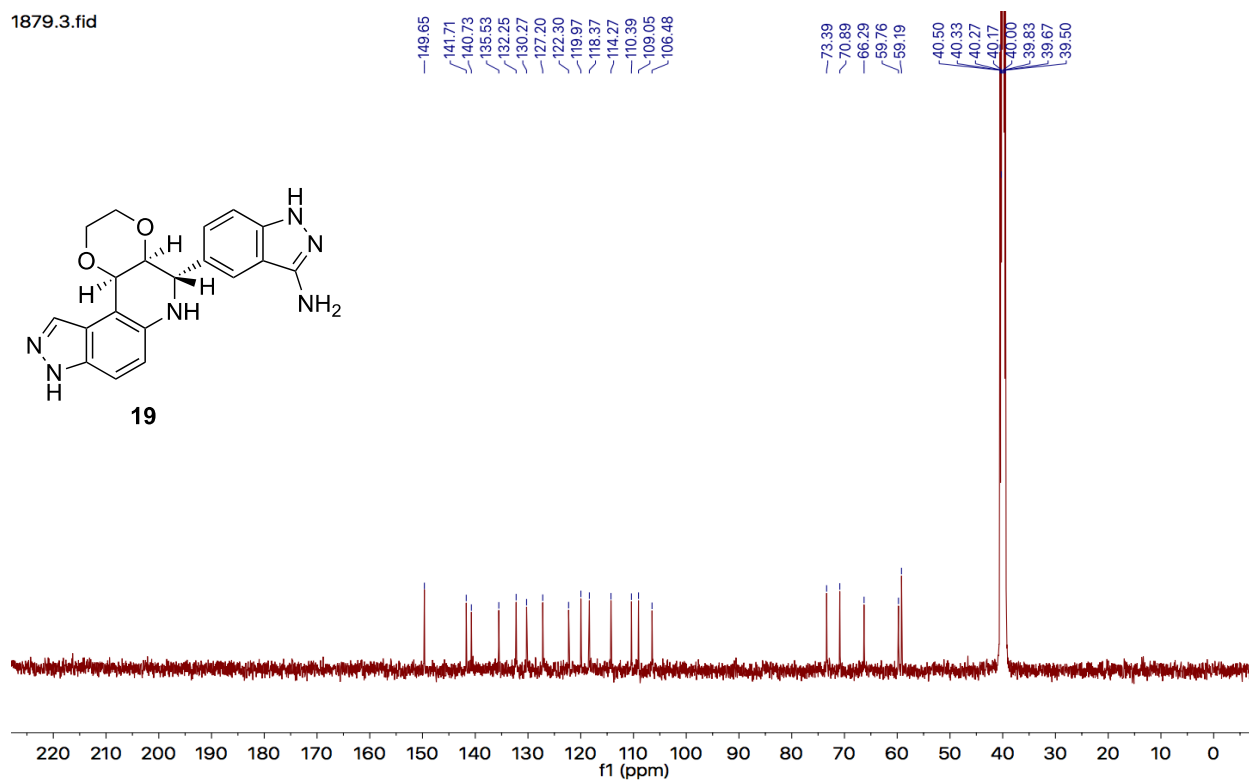

Supplement: ao0c03001_si_001.pdf [file ao0c03001_si_001.pdf]
